# Supplementary material for: Specific depletion of the motor protein KIF5B leads to deficits in dendritic transport, synaptic plasticity and memory
Source: eLife journal article supplement (doi:10.7554/elife.53456), 2020-01-21
Supplement: supp [file elife-53456-supp-v1.zip]

Archive with 26 entries (26 files):
- elife_poa_e53456_Figure_6_figure_supplement_2_source_data_1.xlsx
- elife_poa_e53456_Figure_8_figure_supplement_2_source_data_1.xlsx
- elife_poa_e53456_Figure_7_figure_supplement_1_source_data_1.xlsx
- elife_poa_e53456_Figure_3_source_data_1.xlsx
- elife_poa_e53456_Figure_1_source_data_1.xlsx
- elife_poa_e53456_Figure_8_figure_supplement_1.jpg
- elife_poa_e53456_Figure_6_figure_supplement_1.jpg
- elife_poa_e53456_Figure_6_source_data_1.xlsx
- elife_poa_e53456_Figure_6_figure_supplement_2.jpg
- elife_poa_e53456_Figure_7_source_data_1.xlsx
- elife_poa_e53456_Figure_8_figure_supplement_2.jpg
- elife_poa_e53456_Figure_5_source_data_1.xlsx
- elife_poa_e53456_Figure_1_figure_supplement_1_source_data_1.xlsx
- elife_poa_e53456_Figure_4_source_data_1.xlsx
- elife_poa_e53456_Figure_8_figure_supplement_1_source_data_1.xlsx
- elife_poa_e53456_Figure_1_figure_supplement_1.jpg
- elife_poa_e53456_Figure_7_figure_supplement_1.jpg
- elife_poa_e53456_Figure_6_figure_supplement_1_source_data_1.xlsx
- elife_poa_e53456_Transparent_Reporting_File.pdf
- elife_poa_e53456_Figure_2_source_data_1.xlsx
- elife_poa_e53456_Figure_2_figure_supplement_1_source_data_1.xlsx
- elife_poa_e53456_Figure_2_figure_supplement_1.jpg
- elife_poa_e53456_Figure_3_figure_supplement_1_source_data_1.xlsx
- elife_poa_e53456_Figure_8_source_data_1.xlsx
- elife_poa_e53456_Figure_3_figure_supplement_1.jpg
- elife_poa_e53456_Supplementary_file_1.docx
