# Supplementary material for: Specific depletion of the motor protein KIF5B leads to deficits in dendritic transport, synaptic plasticity and memory
Source: eLife journal article supplement (doi:10.7554/elife.53456), 2020-01-21
Supplement: supp [file elife-53456-supp-v1.zip › elife_poa_e53456_Figure_1_figure_supplement_1_source_data_1.xlsx]

## Sheet: A
A
	KIF5AshRNA								KIF5BshRNA								KIF5CshRNA
		Control shRNA			KIF5A shRNA					Control shRNA			KIF5B shRNA					Control shRNA			KIF5C shRNA
	KIF5A	1	1	1	0.32	0.566406	0.328283		KIF5A	1	1	1	0.944444	0.906318	0.826797		KIF5A	1	1	1	1.01	1.10764	0.735849
	KIF5B	1	1	1	0.76	1.14	1.15217		KIF5B	1	1	1	0.610909	0.536667	0.571819		KIF5B	1	1	1	1.08	1.20325	1.25786
	KIF5C	1	1	1	0.93	1.20751	0.829825		KIF5C	1	1	1	1.34483	0.811921	1.0096		KIF5C	1	1	1	0.165	0.543802	0.554839

## Sheet: B
KIF5A knockdown			KIF5B knockdown
Control shRNA	KIF5A shRNA		Control shRNA	KIF5B shRNA
0.740545	0.840153		0.931752	1.22691
1.06963	0.960901		0.936401	0.842586
1.25408	0.597009		1.10252	0.917818
1.08779	0.710837		1.08143	0.558886
0.872826	0.710967		1.13916	0.759793
1.30193	0.698582		1.40854	0.989604
0.768237	0.922833		0.798908	0.952093
0.847424	0.965031		0.938834	0.839535
1.05753	0.820092		0.961654	0.71357
			0.792185	0.689853
			0.908619	0.64965
