# Supplementary material for: Specific depletion of the motor protein KIF5B leads to deficits in dendritic transport, synaptic plasticity and memory
Source: eLife journal article supplement (doi:10.7554/elife.53456), 2020-01-21
Supplement: supp [file elife-53456-supp-v1.zip › elife_poa_e53456_Figure_1_source_data_1.xlsx]

## Sheet: A
	KIF5A			KIF5B			KIF5C
P1	100	100	100	100	100	100	100	100	100
P7	130.983	50.2645	99.1736	108.681	100.792	64.4654	117.335	72.2927	110
P14	90.8322	85.2564	66.6667	90.1411	86.3032	63.9048	86.8452	49.8258	7.18954
P21	70.9774	50.823	6.37958	77.5515	70.6117	7.73585	64.2777	34.5898	22.2222
P31	55.854	90.4762	4.662	31.9319	68.8333	47.0878	45.36	76.0976	51.462
P56	29.2954	60.3175	10.101	53.1362	18.2099	19.3396	45.1282	63.4146	38.1944

## Sheet: B
KIF5A	KIF5B	KIF5C
1.82577	2.20809	5.12871
0.786735	0.613398	0.914417
0.701158	0.670042	0.871263

## Sheet: C
frequency					amplitude
scr	kif5a KD	kif5b KD	kif5c KD		scr	kif5a KD	kif5b KD	kif5c KD
0.552459	1.43443	0.57541	0.508772		11.222	15.455	11.251	13.881
0.94918	0.627869	0.440984	0.766251		11.268	13.697	10.816	17.203
0.886885	0.662295	0.065574	0.195082		10.527	12.045	8.209	9.453
0.344262	0.693443	0.580328	0.472131		10.574	11.647	11.264	13.262
0.678689	0.547541	0.15082	0.127869		12.545	11.535	14.509	11.174
0.786885	0.85082	0.12623	0.14		11.585	15.175	8.854	10.529
0.855738	0.97541	0.140984	0.647541		16.796	19.282	9.084	11.547
0.109836	0.32459	0.17377	0.714286		8.663	11.631	11.303	12.178
0.111475	0.672131	0.527869	0.450847		10.187	14.634	11.055	9.929
0.552459	0.296721	0.065574	0.229508		11.807	13.202	9.674	13.319
0.5		0.195082			9.275		11.361
0.488525					10.323
0.660656					9.149

## Sheet: D
mushroom					filopodia					thin					stubby
Control shRNA	KIF5A shRNA	KIF5B shRNA	KIF5C shRNA		Control shRNA	KIF5A shRNA	KIF5B shRNA	KIF5C shRNA		Control shRNA	KIF5A shRNA	KIF5B shRNA	KIF5C shRNA		Control shRNA	KIF5A shRNA	KIF5B shRNA	KIF5C shRNA
2.42	2.92	1.5	1.83		0.758394	1.27616	0.821682	0.199528		0.269782	0.369905	0.481247	0.068995		0.449906	0.520984	0.613626	0.066509
2.16	1.88	1.12	2.6		0.194869	0.470072	0.851412	1.22885		0.397366	0.468525	0.195663	0.503457		0.525583	0.671311	0.860257	0.429414
1.99	2.5	0.96	1.09		0.533358	0.196756	0.547159	0.544981		0.132772	0.260906	0.27358	0		0.399829	0.598878	0.41037	0.408735
2.27	3.42	1.34	4.11		0.795157	1.3672	1.53713	0.303851		0.379385	0.410159	0.470173	0		0.750717	0.410159	0.808326	0.225215
1.88	3.92	2.03	2.35		1.44824	0.830358	1.26668	0.131037		0.258953	0.441001	0.380005	0.196137		0.71292	0.616336	0.633342	0.9181
2.14	2.62	2.5	1.76		0.741507	1.08204	1.28539	0.135727		0.270729	0.541575	0.337507	0		0.405427	0.722317	0.13564	0
2.62	2.59	2.04	3.34		0.452607	0.59847	1.31764	0.667296		0.197532	0.660458	0.491134	0.133459		0.32756	0.462009	1.54588	0.266918
1.82	1.22	3.7	2.3		0.771956	0.814215	0.958825	0.612706		0.190145	0.203534	0.410925	0.153176		0.328285	0.474966	0.5479	0.919058
2.25	3.45	3.03	2.87		0.5011	1.04851	1.73962	0.683849		0	0.299575	0.465236	0.27354		0.751649	0.299575	1.0721	0
2.81	3.57	1.69	2.79		0.326584	0.796151	0.843997	0.569162		0.261382	0.6753	0.232049	0.216251		0.849637	0.41687	0.736446	0.173706
3.35	3.84	1.17	2.41		0.645082	0.821928	1.079	0.936352		0.387049	0.136988	0.22062	0.133765		0.516065	0.68494	1.15091	0.535058
2.38	1.35	1.71	1.2		0.786583	1.16728	0.918936	0.534169		0.395181	0.224417	0.131277	0.267085		0.658657	0.26886	0.656383	0.400627
3.01	2.84	1.24	1.63		1.55311	0.854949	1.6684	1.35851		0.335323	0.314348	0.296132	0.271703		0.741251	0.585665	0.444198	0.271703
2.61	3.23	1.34	1.46		1.07517	1.48647	1.47703	1.32631		0.310776	0.39175	0.537101	0.265262		0.539519	0.526181	0.805651	0.663155
2.4	1.86	2.28	2.45		0.643224	0.797662	1.95277	1.77018		0.26652	0	0.342494	0.408504		0.398005	0.398831	0.527776	0.408504
3.06	3.08	1.85	0.82		0.884825	0.862747	1.52303	1.29265		0.478264	0.590145	0.532171	0		0.532269	0.317895	0.532171	0.473475
3.17	4.64	2.54	0.99		0.203561	0.734882	1.48451	1.24163		0.407123	0.327038	0.400004	0.124163		0.807034	0.58931	0.312855	0.248326
1.55	3.37	1.08	2.27		1.08148	0.944341	0.739679	0.133353		0.403547	0.134906	0.134305	0.266707		0.540009	0.674529	0.470402	0.80012
2.71	2.43	1.7	0.93		0.644556	0.677496	1.01154	0.799878		0.128911	0.179965	0.270072	0.399939		0.644556	0.269016	0.34127	0.266626
2	1.83	1.45	1.19		0.666509	0.402407	1.39469	0.528338		0.533207	0.269097	0.926473	0		0.399905	0.359865	0.630457	0.396254
3.31	2.76	3.41	1.24		1.12453	0.677984	1.09078	0.824706		0.462842	0.273098	1.09078	0.412353		0.066	0.241343	0.272694	0.137451
2.08	2.77	2.44	1.2		0.940387	0.385431	1.4933	0.149762		0.201814	0.455438	0.814528	0.383207		0.134946	0.875481	0.678773	0.431679
2.03	1.94	2.66	0.86		0.675262	0.812768	1.29646	0.196513		0	0.2255	0.323809	0.200187		0.135052	0.405295	0.518584	0.453631
2.67	2.18	1.39	3.1		0.533212	0.590725	0.440627	0.808876		0.200744	0.129644	0.34668	0.404438		0.332468	0.394793	0.174797	0.134813
2.18	2.97	1.89	4.16		1.22603	0.589442	0.786865	0.950318		0.136225	0.336396	0.472119	0.11879		0.136225	0.328743	0.314746	0.11879
2.62	1.88	2.18	1.61		0.531239	0.985252	0.818807	0.73581		0.441701	0.2815	0.273446	0.267773		0.307642	0.422251	0.817276	0.133886
2.53	2.09	2.23	2.16		0.87032	0.80992	0.614324	0		0.131139	0.134895	0.677671	0.405805		0.354442	0.337512	0.210442	0.676341
1.63	3.91	2.15	1.81		0.707188	0.742623	0.942201	0.510454		0.220548	0.068995	0.538401	0.129115		0.395959	0.068995	0.4038	0.325792
2.1	2.37	1.53	1.97		0.678642	0.544129	1.26642	0.537327		0.270897	0.203851	0.657058	0.358218		0.744269	0.271276	0.796376	0.179109
2.25	2.73	2.23	1.74		0.526688	0.502005	0.797609	0.26725		0.44384	0.729658	0.478565	0		0.174694	0.141705	0.478565	0.133625
1.32	3.62	3.13	1.84		0.924471	0.758778	1.09035	0.503818		0	0.412309	0.136293	0		0.528269	0.137436	0.40888	0.062959
4.06	2.14	0.91	1.16		0.579888	0.579502	0.874146	0.194954		0.322309	0.066558	0.586311	0.197149		0.064284	0.32303	1.00742	0.451235
5.04	2.21	3.03	1.41		0.592717	0.543849	1.00028	0.212206		0	0.268866	0.315218	0.135811		0	0.071804	0.315799	0.212206
2.97	2.22	1.74	2.03		0.631565	0.398955	1.24642	0.522081		0.227162	0.313119	0.604789	0.261383		0.317945	0.309778	0.925423	0.261155
2.89	3.23	1.28	2.57		0.845824	0.576536	0.572962	0.542615		0.692791	0.317079	0.231451	0.202523		0.275505	0.224675	0.980835	0.339071
2.66	4.03	0.91	1.28		0.597719	1.10663	1.08892	0.342368		0.298859	0.273307	0.226201	0.269295		0.44655	0.093055	0.408449	0.073073
2.5	2.25	1.2	1.63		0.676459	1.05248	1.47111	0.815654		0.202836	0.264276	0.668686	0.271885		0.201825	0.264276	0.668686	0.135942
1.44	2.65	1.9	2.68		0.068962	0.507796	1.3538	0.292746		0.137925	0.231241	0.54152	0.13453		0.342174	0.320479	0.6769	0.146373
2.33	1.86	1.58	0.54		0.72902	0.870526	0.529317	0.271416		0.544127	0.233009	0.198179	0.135708		0.493547	0.458502	0.860456	0.67854
1.78	2.28	1.31	2.62		0.964953	0.577959	1.10146	0.444378		0.350935	0.089935	0.479207	0.19521		0.467066	0.846988	0.485062	0.191043
3.1	2.96	1.8	2.62		0.854029	0.500477	1.20128	0.314321		0.226293	0.223816	0.547267	0.225012		0.493443	0.3195	0.505782	0.678344
1.94	2	1.51	3.14		0.68155	0.674497	0.725513	0.281159		0.454799	0.090663	0.333209	0.095925		0.461191	0.439587	0.86257	0.676616
2.05	2.86		1.19		0.204281	0.802509		0.25967		0.410347	0.33249		0.198042		0.886407	0.666034		0.194752
1.16	1.79		1.29		0.311295	0.809753		0.57648		0.266317	0.491513		0.39918		0.537595	0.359077		0.622252
2.88	2.84		2.29		0.781984	0.313422		0.74261		0.308858	0.44766		0.201842		0.53274	0.496531		0.203734
2.36	3.43		0.68		0.501331	0.645283		0.135014		0.265519	0.521095		0.199294		0.267043	0.406184		0.276483
4.63	1.39		1.75		0.227427	0.608948		0.20182		0.683909	0.300536		0.066113		0.453901	0.436404		0.269674
3.23			2.61		0.739989			0.400592		0.60529			0.401102		0.269398			0.484634
3.71			2.66		0.627681			0.753545		0.803036			0.392562		0.537938			0.533299
2.41			2.13		0.56174			0.354196		0.278028			0.209151		0.350377			0.418303
			1.22					0.405086					0					0.135029
			1.9					0.612471					0.04269					0.398642
			3.58					0.46918					0.46918					0.46918
			3.74					0.515872					0.807563					0.640064
			2.44					0.582699					0.085721					0.304852
