# Supplementary material for: Specific depletion of the motor protein KIF5B leads to deficits in dendritic transport, synaptic plasticity and memory
Source: eLife journal article supplement (doi:10.7554/elife.53456), 2020-01-21
Supplement: supp [file elife-53456-supp-v1.zip › elife_poa_e53456_Figure_2_figure_supplement_1_source_data_1.xlsx]

## Sheet: C
Spine density			Puncta density			% Spine with puncta
KIF5A-GFP	KIF5B-GFP		KIF5A-GFP	KIF5B-GFP		KIF5A-GFP	KIF5B-GFP
0.635897	0.770318		4.20181	4.07746		40.9831	35.6588
0.587705	0.684212		4.154	2.34001		34.0909	6
0.384466	0.548267		3.09199	3.80868		54.2529	29.5238
0.564124	0.414139		4.63039	3.69518		55.086	56.7708
0.536523	0.704939		4.34876	3.20675		50.6641	18.1241
0.49777	0.687528		4.58912	5.31149		57.2753	43.1373
0.581	0.802626		5.19995	3.79547		30	45.7627
0.6747	0.679987		4.59137	3.86263		43.9372	33.9562
0.476761	0.352916		0.840597	2.08157		21.0384	42.7857
0.300399	0.423599		4.74262	2.97726		36.2319	26.6373
0.458763	0.497083		3.92816	2.88766		53.125	34.7727
0.458497	0.390461		5.82561	5.04907		76.4706	37.931
0.38017	0.435244		2.1712	4.84969		31.7308	47.749
0.367559	0.659259		2.80276	2.8235		34	26.1734
0.512518	0.559564		5.31247	2.6892		74.6454	27.4989
0.238415	0.617283		1.83381	5.07488		32.3809	50.9528
0.664	0.581534		2.41529	4.17381		29.932	20.3618
0.376763	0.539186		4.72299	4.32553		46.4286	29.1667
0.519529	0.547763		2.35888	2.85219		22.8779	25.0273
0.416945	0.507114		1.86025	2.32206		8.28544	28.9474
0.518759	0.464388		5.7766	3.40861		57.8028	49.697
0.59375	0.321259		1.86975	2.14601		24.0071	28
0.268647	0.38		2.70809	2.71703		30.1471	22.9064
0.358909	0.423789		3.15905	1.38909		65.1455	25.9915
0.710481	0.436137		1.38149	3.72827		14.8148	38.7097
0.814562	0.331661		5.68992	0.956576		83.8919	20.0321
0.563704	0.265561		0.214745	4.70043		4.7619	50

## Sheet: D
Spine density			Puncta density			% Spine with puncta
KIF5A	KIF5B		KIF5A	KIF5B		KIF5A	KIF5B
0.595794	0.931783		2.14886	2.05751		34.8148	13.4615
0.977093	0.799024		2.08057	1.40046		17.67	18.9655
0.632813	1.02106		2.0127	0.849856		42.8788	14.7436
0.759589	0.989881		3.20382	1.00447		36.8421	10.9756
0.52424	1.00205		1.93164	1.30425		32.5	27.1164
1.04809	0.717557		2.77224	2.06452		32.8767	27.676
1.03962	0.817915		3.35113	2.18428		36.4865	54.2373
0.660826	0.802134		2.2565	1.8585		28.0213	13.7669
0.845502	0.473222		1.75942	1.35375		19.0476	25.7143
0.623226	0.652859		1.60553	0.813141		20.2401	6.52174
0.746539	0.92171		3.10541	0.594385		53.5714	4.34783
1.01079	0.57828		2.90317	1.07352		34.5679	7.5
1.08974	1.46494		2.59495	1.42961		26.2823	35.7703
1.01294	1.08342		2.41571	1.49404		35.0685	33.8492
0.753384	1.37675		1.69043	1.77412		30	32.4838
0.476944	0.873142		0.849193	0.771546		21.9512	13.022
0.65163	0.852709		1.43625	0.841339		42.8571	24
0.693014	0.466997		1.27932	0.437809		22.5794	9.375
1.05359	1.12429		1.16961	1.89354		19.5014	37.8947
0.783612	1.08405		1.62448	1.09713		26.4715	24.9152
1.12727	0.476397		2.5869	0.938783		32.6852	11.7647
1.01311	0.493223		1.46674	1.00564		29.8508	11.9118
1.01494	0.600036		1.09072	1.21689		11.8887	32.2222
1.02231	0.704725		2.031	0.58619		44	28.1206
1.0087	0.967927		1.37045	0.389527		25.7252	9.81087
1.37982	1.16599		2.64524	1.86136		49.5775	32.4452
0.861723	1.02679		1.46491	1.78505		28.5714	16.0923
0.90064	1.15877		0.997137	1.32081		17.8571	9.35021
1.20956	0.875363		1.30159	0.993396		34.7826	14.386
1.01104			1.54302			37.4375
0.722788			1.1288			21.6667
0.646123			1.35768			29.979
1.02493			2.11433			42.6407
