# Supplementary material for: Specific depletion of the motor protein KIF5B leads to deficits in dendritic transport, synaptic plasticity and memory
Source: eLife journal article supplement (doi:10.7554/elife.53456), 2020-01-21
Supplement: supp [file elife-53456-supp-v1.zip › elife_poa_e53456_Figure_2_source_data_1.xlsx]

## Sheet: A
scr	kif5bsh	kifbsh+kif5b	kif5bsh+kif5a
3.13	1.17	2.81	1.54
1.57	1.07	2.29	0.95
2.1	1.89	1.6	2.35
1.6	1.31	1.91	2.3
1.47	1.94	2.12	1.81
2.18	1.2	1.78	1.98
1.71	1.87	1.92	0.81
2.68	1.25	3.63	1.22
2.44	1.32	1.36	2.87
2.44	1.52	2.56	1.31
1.47	0.94	1.73	0.88
1.31	1.43	1.52	1.97
1.01	1.59	2.04	0.82
1.79	0.84	0.47	2.29
2.69	1.35	1.57	1.32
2.59	2.03	5.21	1.23
2.9	2.21	3.22	2.18
3.04	0.8	1.48	1.57
1.89	1.63	4.08	1.62
1.47	1.08	1.99	0.95
0.81	0.82	3.18	1.64
1.17	1.73	1.46	1.72
2.3	2.17	2.78	1.3
2.07	2.93	2.57	2.62
2.23	2.46	2.42	1.91
1.65	1.41	1.46	2.8
2.39	3.01	3.38	1.95
2.86	0.28	2.29	2.06
2.25	1.2	1.36	1.37
2.91	2.89	2.19	2.17
2.66	1.2	2.23	1.53
3.3	0.95	1.71	2.26
3.61	1.99	2.38	1.88
2.42	1.06	2.84	1.33
3.19	1.63	2.41	1.79
2.91	1.92	3.87	2.04
1.81	1.91	3.43	0.41
2.68	1.5	2.9	1.96
1.89	1.82	4.45	0.83
1.75	0.95	1.65	0.95
2.02	1.27	1.94	0.98
2.51	1.8	1.9	1.35
2.57	1.77		1.38
2.9	1.1		1.82
2.32	0.93		1.48
1.97	2.04
2.05	0.82
3.15
2.71
3.13
2.57

## Sheet: B
scr	kif5bsh	kif5bsh+kif5b	kif5bsh+kif5c
1.8417	1.08821	3.226	3.15939
2.07866	1.55523	1.75816	3.74691
3.51599	1.51896	1.95872	1.16947
3.13157	1.9729	2.14261	4.65524
1.79897	1.41177	3.26322	1.47287
2.7972	1.87406	2.4691	4.26172
1.72258	1.764	0.938705	3.00138
2.27654	2.11158	2.55375	2.3517
2.5073	1.61641	1.36151	1.43969
2.65311	1.92329	1.87406	1.4948
3.27159	1.62752	1.57955	1.91
2.71463	1.75041	1.93316	2.65455
3.358	1.06566	1.746	2.7376
3.60085	1.27791	1.60938	1.99736
2.88883	1.2792	1.82502	1.65868
3.15136	1.9786	2.25044	3.28371
2.66869	0.972444	2.13692	3.00775
1.94711	1.83679	1.54659	2.05471
2.3493	2.12423	1.45812	1.75575
2.3813	0.979025	2.18258	3.74205
2.46992	1.05484	2.88454	1.44778
3.26255	2.45096	1.5287	1.59106
2.38142	1.71076	2.25442	1.73892
3.23963	1.63794	2.43542	1.61393
4.37946	0.864374	2.19899	1.75432
3.58124	0.917675	2.50413	1.72321
3.87665	1.07593	1.33642	2.23066
1.18823	2.12068	2.22277	1.24581
2.11868	2.38573	1.70385	0.922597
2.86113	1.48914	1.57493	1.86
2.99069	0.9204	1.83535	3.54
2.03797	2.27656	1.54185	1.88
1.74769	1.70805	3.00073	3.07
1.64872	1.34734	2.61136	5.13
1.69454	2.1054	2.06182
2.9219	2.01	1.44142
2.54583	1.83	2.23377
2.38526	2.19	1.06582
4.22	2.29	2.86692
2.64	1.73	2.66
3.65	1.68	3.02
3.64		1.62
2.6		3.78
3.09		3.1
2.35		3.47
		2.98
