# Supplementary material for: Specific depletion of the motor protein KIF5B leads to deficits in dendritic transport, synaptic plasticity and memory
Source: eLife journal article supplement (doi:10.7554/elife.53456), 2020-01-21
Supplement: supp [file elife-53456-supp-v1.zip › elife_poa_e53456_Figure_3_figure_supplement_1_source_data_1.xlsx]

## Sheet: B
Travel distance				Net displacement				Maximal run length				Maximal velocity (anterograde)			Maximal velocity (retrograde)
Control shRNA	KIF5A shRNA	KIF5B shRNA		Control shRNA	KIF5A shRNA	KIF5B shRNA		Control shRNA	KIF5A shRNA	KIF5B shRNA		Control shRNA	KIF5A shRNA	KIF5B shRNA	Control shRNA	KIF5A shRNA	KIF5B shRNA
24.084	7.582	12.934		-24.084	-7.582	-0.446		24.084	5.352	2.453				0.446	1.0035	0.669	0.446
9.366	99.681	36.126		1.784	-24.307	35.9773		2.453	30.328	10.927				1.02441	0.3345	2.3415	0.02027
8.92	5.352	15.9445		-4.014	-1.338	-15.9445		2.007	1.561	15.9445		0.446	2.26717		0.26017	0.3122	0.88581
6.913	10.704	7.6935		-6.913	-10.704	-7.6935		6.913	7.2475	7.6935		0.139375	0.223		0.76811	1.20792	0.54954
5.798	10.927	11.373		5.798	-10.927	11.373		5.798	10.927	11.373				0.733742		0.99336
20.739	12.042	4.46		-20.739	12.042	1.338		20.739	12.042	1.338		0.644222		0.2676	1.59531		0.223
21.0735	12.265	6.69		10.5925	-12.265	0		8.8085	12.265	1.115			0.48168	0.446	0.3568	0.51104	0.3345
6.021	7.582	40.586		3.122	-1.784	40.586		4.5715	1.561	40.586		1.7617		2.53662	0.41414	0.3122
17.394	23.638	26.091		-3.122	2.676	22.077		8.028	8.697	21.631		0.703308	0.297333	1.54507	0.8028	0.74333	0.446
44.823	8.92	7.136		12.265	-5.798	-1.784		16.056	2.453	1.338		0.446	1.7394	0.223	1.0035	1.2265	0.223
23.9725	20.739	5.352		1.4495	20.739	0.892		3.791	20.739	2.007		2.676	0.3345	0.250875	0.57343		0.14867
9.366	17.171	9.589		-9.366	-17.171	0.223		9.366	11.373	1.561		0.4014	2.30433	0.446	0.81443	2.899	0.7805
34.565	6.74575	15.833		-34.565	2.73175	3.345		13.7145	2.50875	5.129				1.0258	3.91843	0.27256	0.52033
17.394	10.481	8.92		17.394	-2.899	0.446		17.394	1.561	1.561			0.83625	0.520333		0.446	0.669
6.69	11.596	16.3905		-1.784	-8.474	-16.3905		0.892	2.676	6.467		1.24243	0.892		0.446	0.669	1.1373
7.359	17.394	8.1395		4.683	-17.394	-8.1395		2.23	17.394	8.1395		0.223	0.446		0.3345	1.7394	0.77519
7.805	9.812	9.589		-0.669	-0.446	-9.589		0.892	2.007	9.589		0.743333			0.223	0.223	0.66131
6.69	4.014	8.251		-6.69	-2.676	-8.251		4.014	1.115	8.251		0.3345	1.0035		1.0035	0.446	0.91678
25.422	12.488	20.8877		9.143	-12.488	-20.8877		3.0105	12.488	9.366			0.025731		2.007	2.08133	2.3415
22.6345	5.4635	15.9817		22.6345	-5.4635	-15.9817		22.6345	5.4635	8.028		2.1185				0.42027	0.76971
11.15	12.8225	18.4718		-11.15	-12.8225	18.4718		11.15	12.8225	18.4718		0.984109		0.427919	0.79643	0.71236
7.9165	24.6415	10.0722		-7.9165	24.6415	10.0722		7.9165	24.6415	10.0722				0.47585	1.13093
9.9235	9.812	18.509		-9.9235	9.812	-14.049		9.4775	9.812	7.582			0.623835	0.446	0.7582		0.7805
9.366	4.46	21.631		5.798	-4.46	-21.631		4.46	4.46	11.15			0.754769		0.223	0.63714	1.59286
13.826	4.683	11.819		13.826	-1.115	-9.589		13.826	0.892	4.014		2.23		0.223		0.29733	2.007
22.969	12.488	9.366		-22.969	-12.488	-3.122		22.969	7.359	1.784		1.3826	0.223	0.3345	1.53127	2.5645	0.29733
78.3845	15.61	9.366		67.4575	-15.61	8.474		28.2095	9.589	6.021				3.0105	1.0927	0.73762	0.223
7.582	4.683	6.69		-0.892	1.115	-0.892		1.784	2.007	1.561		4.237		0.223	0.669	0.14867	1.561
12.042	21.408	10.035		-12.042	-21.408	-1.115		12.042	21.408	1.115		0.3568	0.250875	0.223	0.68811	3.568	0.29733
15.4985	18.509	18.509		15.4985	18.509	-18.509		15.4985	18.509	18.509							1.32207
5.798	3.568	8.92		-5.798	1.338	-8.92		5.798	2.007	8.92		1.06886	4.62725		0.52709	0.14867	0.93895
8.697	13.157	8.251		8.697	13.157	8.251		8.697	13.157	8.251			0.4014	0.916778
8.92	22.969	12.042		0	22.969	2.007		4.46	22.969	3.0105		0.599793	0.822313	0.6021	1.48667		0.2453
6.1325	21.7053	9.4775		6.1325	21.7053	-9.4775		6.1325	21.7053	9.4775		0.810909	3.82817				1.35393
22.523	16.056	15.387		22.523	-16.056	-15.387		22.523	16.056	7.582		0.471731	2.32557			1.18933	1.72825
15.4985	7.805	8.92		-15.4985	-7.805	0.446		15.4985	7.805	2.453		1.32488		0.408833	1.23988	0.70955	0.892
10.1465	5.0175	8.697		-10.1465	-5.0175	-0.223		10.1465	5.0175	1.338				0.2676	0.96633	0.59029	0.3345
8.1395	25.3105	15.387		0.7805	-25.3105	-15.387		2.453	11.596	9.366					0.3122	2.04417	1.2042
10.927	5.2405	8.474		8.697	-5.2405	0.446		9.812	5.2405	4.46		0.4906		2.23	0.50175	0.80623	0.446
14.495	3.568	12.265		-10.035	-2.899	12.265		7.582	2.3415	12.265		0.654133		0.570465	0.96633	0.39025
60.433	33.45	6.244		-60.433	33.45	-1.561		60.433	25.199	1.4495		0.520333	0.223	0.188692	1.31376		0.1784
27.206	12.042	18.4347		27.206	-6.244	-13.9747		27.206	4.014	8.99433			1.79993	0.230689		1.338	0.49161
6.467	36.349	5.50067		-6.021	-36.349	5.50067		5.352	25.868	5.50067		1.3603	0.669	1.50018	0.669	1.84771
18.732	20.739	12.711		18.732	-20.739	0.223		18.732	20.739	1.338		0.074333		0.669		1.88536	0.3345
14.5693	24.53	13.2685		12.4137	24.53	-13.2685		9.589	24.53	13.2685		1.338			0.38041		0.63183
11.819	13.603	7.582		11.819	-13.603	2.23		11.819	13.603	2.453		1.27853	1.63533	0.817667		0.87761	0.223
5.129	18.9178	22.523		1.561	-14.2348	-22.523		1.561	13.3428	22.523		1.47738			0.446	2.10676	3.21757
5.798	8.028			5.798	-1.784			5.798	1.115			0.183647	1.115			0.5575
30.551	2.899			-9.589	2.007			14.941	1.115			0.527091	0.446		1.66011	0.223
4.237	8.30675			2.007	-1.05925			2.007	1.61675			1.338	0.5575		0.5575	0.24327
5.352	6.244			1.784	0.892			1.115	0.94775			0.892	0.27875		0.1115	0.223
8.697	5.129			8.697	1.784			8.697	1.561			0.371667	0.291615			0.13938
8.251	6.69			-8.251	-2.007			8.251	1.4495			1.08712	0.223		1.10013	0.2899
19.401	14.718			16.725	-6.913			6.021	9.2545				0.2676		0.3345	1.23393
5.42633	25.645			-3.93967	-25.645			4.31134	25.645			1.2042	0.9812		1.17582	1.22119
	8.92				1.338				1.115			0.159286				0.446
	19.847				19.847				16.948				0.446
	51.736				-51.736				35.903				0.807048			2.11194
	9.589				8.697				8.251							0.446
	34.2305				-7.4705				9.812				1.17871			1.4495
	9.143				-2.23				2.7875				0.871727			0.61944
	12.8225				12.8225				6.5785				0.39025
	8.697				-2.453				2.899				0.469893			0.446
	6.913				-2.453				2.23				0.286714			0.446
	10.258				-10.258				10.258				0.669			0.60341
	8.697				-7.136				7.136							0.446
	15.7215				-15.7215				7.2475				0.185833			0.69024
	16.279				16.279				16.279
	10.704				-7.582				5.129				2.71317			0.56989
	10.704				-0.892				2.007				0.3345			0.29733
	10.3138				-10.3138				10.3138				0.4014			2.06275
2.23	8.92	45.046		-1.784	-1.338	-45.046		2.007	2.676	22.523		0.008577	0.27875		0.669	0.2676	2.04755
34.565	4.46	26.2397		-34.565	-0.892	-26.2397		18.955	2.007	26.2397		1.53622	0.1338			0.2007	2.07155
21.185	73.144	11.5217		21.185	22.746	-11.5217		6.467	33.673	11.5217		0.669	1.6725			0.7805	1.3826
11.373	42.147	4.46		-2.007	42.147	-2.23		1.784	20.962	1.561		0.669	2.31363	0.223	0.26017		0.52033
10.258	31.443	32.781		-10.258	-31.443	-32.781		9.88633	16.948	24.53					1.23579	6.467	2.75033
16.948	10.481	5.94667		-16.948	-10.481	0.148668		16.948	10.481	1.63533				0.270786	2.5422	1.31013	0.27256
14.049	7.805	22.969		-2.007	-7.805	-5.129		1.561	7.805	4.83167		0.892		1.4495	0.446	1.30083	1.6948
3.122	4.683	4.46		-1.338	2.007	-2.97333		0.892	1.784	2.37867		0.223	0.27875	0.148667	0.446	0.10292	0.7136
3.568	16.056	24.9017		-0.892	0.892	16.1303		1.338	2.007	19.3267		0.223	0.669	4.83167	0.223	0.446	0.93979
6.244	8.697	11.373		-1.784	4.237	1.561		1.561	4.014	1.784		0.260167	0.8028	0.446	0.446	0.446	0.892
13.7517	2.899	3.568		-1.115	-2.007	-2.23		7.43333	1.784	1.784		0.702037	0.0446	0.148667	1.59286	0.446	0.446
9.66333	9.4775	8.028		0.297332	9.4775	0.446		4.98033	9.4775	1.784		0.55337	3.15917	0.5575	0.45319		0.3345
8.251	6.244	29.659		-8.251	6.244	29.659		8.251	6.244	18.732			0.693778	2.73175	0.45005
6.09533	15.4985	13.826		-6.09533	-15.4985	-13.826		6.09533	15.4985	13.826					0.76192	1.19219	2.7652
2.23	8.251	17.617		1.784	-4.237	17.617		1.338	2.23	4.683		0.669	0.446	0.892	0.07433	1.338
32.112	20.962	8.028		32.112	8.251	8.028		32.112	3.9025	8.028		2.29371	1.05925	2.676		1.39375
24.307	5.352	25.645		24.307	-1.338	-8.39967		8.251	1.4495	9.96067		3.568	0.0892	0.587909		0.24158	0.5575
22.746	5.575	12.6367		-22.746	-5.575	0.743332		22.746	5.575	3.15917				0.399053	1.8955	1.85833	0.70204
2.23	14.049	4.683		2.23	-10.035	-2.007		1.338	4.5715	2.15567		0.063714	0.483167	0.121636		0.9143	0.34037
15.833	47.6105	21.631		-15.833	47.6105	-21.631		7.136	47.6105	21.408			1.61391		2.676		0.79289
8.474	7.9165	9.143		-8.474	7.9165	0.223		8.474	2.7875	1.115			1.338	0.446	1.41233		0.669
8.028	9.0315	18.286		8.028	-9.0315	18.286		8.028	9.0315	18.286		1.41671		2.28575		0.75263
23.861	11.373	11.819		-23.7123	-0.669	-11.819		13.157	5.64933	11.819		0.0223	1.09785		1.87957	0.94156	2.95475
11.2987	16.502	6.913		11.2987	16.502	-1.85833		11.2987	11.2987	1.93267		2.82467	1.20077	0.159286			0.38653
7.21033	17.5427	13.9003		1.561	17.5427	2.007		2.97333	17.5427	7.21033		0.424762	1.38495	0.831961	0.1338		0.94156
18.4347	6.467	21.7053		18.4347	5.129	21.7053		10.7783	4.906	21.7053		1.70184	0.545111	2.83113		0.0446
27.206	42.816	7.73067		-27.206	42.816	7.73067		12.488	17.171	7.73067			1.41233	1.65657	2.453
10.035	15.387	27.2803		10.035	-15.387	-27.2803		5.129	15.387	27.2803		2.453				1.0258	1.67022
14.941	50.175	8.92		-10.927	41.255	-8.92		10.481	16.725	8.92		0.446	3.84675		1.74683	0.40545	1.91143
26.314	10.035	16.279		24.084	0.223	-16.279		9.812	1.6725	16.279		1.63533	0.223		0.14867	0.446	1.6279
13.157	19.847	4.906		13.157	-19.847	1.338		5.352	19.847	2.007		1.338		1.0035		0.82696	0.29733
9.812	26.8715	8.92		9.812	26.8715	0.446		3.791	16.3905	1.784		1.561	1.82117	0.594667			0.14867
37.018	9.2545	10.481		-37.018	-9.2545	3.345		12.265	9.2545	4.683				2.3415	3.64233	0.57841	0.3345
9.812	20.293	9.589		-0.446	-20.293	-1.115		2.676	20.293	1.561		0.408833		0.446	0.24327	0.73793	0.669
6.913	10.704	2.23		-6.913	-10.704	-1.784		6.913	10.704	1.115				0.074333	0.57608	1.01943	1.115
7.06167	12.8225	10.1093		-7.06167	12.8225	10.1093		7.06167	12.8225	10.1093			0.801406	1.26367	0.73052
12.042	5.352	10.258		-7.136	3.122	-10.258		5.352	2.676	10.258		0.3345	0.892		1.338	0.223	1.70967
4.906	4.683	16.056		-3.122	-0.669	16.056		3.122	1.561	16.056		0.223	0.1115	1.55381	0.446	0.1784
9.99783	48.614	5.94667		9.99783	48.614	-5.94667		9.99783	34.119	5.94667		0.674011	2.7875				0.74333
33.45	23.192	19.1037		5.798	23.192	-7.21033		8.474	23.192	11.5217		2.23	1.784	0.5575	1.04067		0.59595
8.21383	18.063	11.0757		-2.86183	-18.063	-11.0757		3.08483	10.258	11.0757		0.10704			0.41131	1.85833	0.36919
13.2313	6.69	12.934		-13.2313	-6.69	-12.934		13.2313	6.69	12.934					0.29845	0.669	1.2934
9.366	23.192	3.86533		7.136	-23.192	3.86533		5.352	23.192	3.71666		0.764571		0.271951	0.0446	1.32526
33.896	4.683	28.9157		-14.718	-2.007	-28.9157		9.589	2.23	28.9157		1.36986	0.3345		1.6948	0.5575	1.20482
20.962	8.474	16.279		-20.962	1.338	5.94667		6.69	1.784	5.42634			0.223	2.71317	4.906	0.3122	0.73271
6.021	12.488	10.258		0.520336	5.352	-0.446		1.93267	2.676	1.338		0.263546	1.338	0.669	0.16725	0.3122	0.3345
8.028	5.129	5.798		-0.59467	0.669	0		1.63533	2.23	2.007		0.204417	0.446	0.669	0.3345	0.446	1.115
5.50066	7.136	11.15		0.297332	-5.352	-5.352		1.41233	2.453	3.345		0.143357	0.669	0.223	0.70617	0.892	0.5575
6.3555	24.53	9.589		-3.2335	-24.53	2.007		2.676	10.035	2.007		0.070421		0.892	0.20585	1.63533	0.3345
23.3035	66.231	12.711		-23.3035	66.231	-0.223		11.15	22.746	2.23			1.8955	0.7805	1.59286		0.5575
85.0745	41.924	2.453		10.3695	41.924	-1.561		26.2025	22.746	2.007		1.561	2.13089	0.005868	0.98877		0.2007
28.767	21.185	4.683		28.767	21.185	3.345		20.293	21.185	2.23		0.498471	1.76542	1.784			0.06371
17.617	41.701	5.798		17.617	41.701	-3.568		17.617	15.387	1.784		0.997189	5.129	0.1115			0.669
66.9	17.171	4.46		-12.042	17.171	-3.122		18.1373	16.502	1.784		1.02868	2.06275	0.083625	2.17648		0.892
24.4557	26.091	49.506		-24.4557	26.091	49.506		15.3127	26.091	49.506			1.7394	3.09413	1.31251
2.676	5.575	57.534		-1.784	5.575	57.534		2.007	5.575	57.534		0.013938	1.115	2.13089	0.50175
41.924	50.844	10.258		34.342	-50.844	-10.258		9.366	16.056	10.258		5.575			0.63183	2.676	2.5645
11.373	9.143	4.08833		-7.805	9.143	1.85833		4.906	9.143	0.966336		0.39025	1.8286	0.362375	1.63533		0.07168
7.136	42.4443	21.408		1.338	42.4443	1.18934		1.561	42.4443	8.62267		0.39025	2.35802	1.36147	0.446		2.11848
16.502	12.3393	10.1837		16.502	12.3393	2.15567		16.502	12.3393	1.63533		3.3004	1.54242	0.817667			0.24924
9.143	8.39966	7.87933		0.223	-8.39966	6.69		1.93267	8.39966	5.05467		0.446		1.8955	0.26548	1.14541	0.27875
25.2733	19.401	11.819		25.2733	8.697	-11.819		25.2733	4.683	11.819		1.2229	2.007			1.05925	1.68843
16.7993	2.899	10.258		-16.7993	-2.453	10.258		16.7993	1.784	6.244			0.014867	4.014	2.3999	0.59467
7.136	8.92	22.077		2.23	-5.352	-22.077		1.115	5.575	13.603		0.5575	0.446		0.223	1.39375	5.575
2.899	20.293	8.92		1.115	-2.60167	-2.23		1.561	11.4473	2.453		0.39025	0.636366	0.669	0.892	2.453	1.2265
10.8527	2.97333	11.596		-0.14867	2.82467	-5.352		4.46	2.899	3.345		0.377385	0.790635	0.520333	0.38229	0.00474	0.83625
20.293	4.72016	14.941		0.223	2.1185	-14.495		8.251	2.08133	14.718		1.17871	0.446	0.006559	4.46	0.1561	1.338
10.481	4.72016	5.64933		-0.669	2.1185	5.64933		2.007	2.08133	5.64933		0.446	0.446	0.413366	0.2676	0.1561
17.84	6.54133	9.589		-17.84	-0.14867	-1.561		17.84	2.08133	2.676			0.446	0.446	1.37231	0.35043	0.892
8.474	12.5623	14.941		8.474	-0.223	-3.791		8.028	2.15567	5.798		1.338	0.50175	0.7136	0.446	0.24158	0.96633
9.366	3.9025	3.122		-9.366	1.0035	2.676		4.014	1.0035	2.007			0.223	0.250875	3.345	0.25088	0.223
9.143	5.72367	12.488		-0.223	-5.72367	12.488		2.676	5.72367	12.488		0.223		1.784	0.38229	1.2265
37.3897	18.955	4.014		4.237	-18.955	4.014		6.76433	18.955	4.014		0.916777		0.8028	0.84554	2.10611
23.638	18.955	3.568		-18.8807	18.955	3.568		18.8807	10.927	3.568		0.327067	2.73175	1.18933	2.4627
11.15	18.732	6.31833		-10.258	18.732	6.31833		10.704	18.286	6.31833		0.008012	1.8286	1.18469	2.29372
15.833	43.262	20.739		-0.07434	43.262	18.955		7.95367	35.011	18.955		0.7582	3.5011	2.10611	0.59653		0.223
10.1837	6.98733	8.474		10.1837	-1.338	-8.474		10.1837	1.48666	8.474		1.27296	0.262353			0.19822	1.15555
14.718	14.4207	6.39267		1.338	0.148666	6.39267		4.237	2.453	6.39267		0.7805	0.418125	1.19863	0.446	0.48317
2.676	7.87933	34.342		2.676	0.297334	-34.342		0.892	2.08133	34.342		0.669	0.362375			0.446	2.14638
7.136	20.516	34.119		7.136	-20.516	-34.119		4.014	9.812	34.119		1.561				3.122	1.62471
9.812	14.272	24.753		8.028	-14.272	-12.265		4.906	8.697	11.819		1.2265		0.371667	0.669	1.4495	1.18933
20.07	14.941	32.558		-16.948	14.941	-32.558		11.373	11.596	18.732		0.892	1.4495		3.568		2.7652
7.582	5.798	10.481		6.39267	2.676	10.481		6.09533	1.784	6.467		0.571438	0.446	2.15567	0.1115	0.223
7.359	11.819	16.4277		-3.791	11.819	-16.4277		4.237	3.568	16.4277		0.223	2.676		1.41233		0.88005
18.955	9.29167	16.725		-18.955	-2.60167	-16.725		18.955	2.52733	16.725			0.223		1.83435	0.29162	3.58393
18.286	6.39267	41.924		-6.244	6.39267	9.812		4.014	6.39267	16.056		0.446	0.518324	2.4976	1.0035		1.338
2.899	10.704	12.265		-2.007	-3.568	12.265		0.892	2.007	12.265		0.148667	0.446	2.04417	0.892	0.892
6.913	6.467	35.68		-0.223	-0.669	21.5567		1.338	1.338	15.833		0.892	0.669	0.931353	0.669	0.669	1.31012
15.9073	24.084	8.32533		-15.9073	-11.596	8.32533		15.9073	6.913	8.32533			0.83625	1.13527	0.39116	1.48667
9.589	13.157	12.711		9.589	2.007	3.49367		5.129	1.561	4.53433		2.23	0.5575	0.851455		0.39025	0.26651
14.7923	15.164	2.899		-14.7923	-15.164	-2.007		14.7923	15.164	1.338				0.074333	1.30521	1.5164	0.669
8.251	9.66333	7.136		1.115	9.66333	0.446		0.892	6.244	0.892		0.892	0.814435	0.446	0.669		0.892
20.739	7.359	13.603		-20.739	7.359	13.603		20.739	7.359	13.603			2.007	0.906867	3.4565
16.056	7.87933	18.286		-0.446	-4.014	-17.394		8.251	3.86533	16.948		1.2265	0.293421	0.446	0.68758	0.52033	2.42114
14.495	15.387	26.76		2.007	-11.373	26.76		6.467	7.805	26.76		1.61675	0.1115	1.338	1.0035	1.30083
8.251	6.913	11.373		8.251	6.913	-0.223		8.251	6.913	2.007		2.75033	2.30433	0.446			0.4014
8.697	8.92	6.021		8.697	-4.46	6.021		6.69	1.784	3.345		3.345	0.223	1.6725		1.115
10.481	44.377	10.704		-10.481	-44.377	-5.352		6.39267	44.377	3.568				0.297333	2.39725	2.21885	1.115
25.199	5.575	26.091		25.199	-3.345	-26.091		25.199	3.568	26.091		1.67993	0.1115			1.18933	2.007
4.237	5.129	8.92		-0.223	-1.115	0.148668		2.007	1.338	2.23		0.3122	0.892	0.557499	0.50175	1.338	0.47786
16.279	5.798	17.9887		-2.899	0.892	17.9887		4.906	2.007	17.9887		0.700857	0.50175	1.79887	2.453	0.892
23.861	9.812	8.32533		-22.077	2.676	8.32533		10.481	2.007	8.32533		0.1115	1.0035	1.2488	1.561	0.3345
6.021	37.018	10.5553		2.899	25.422	10.5553		0.669	15.164	10.5553		0.3345	2.676	1.37678	0.14867	0.30409
6.244	6.467	5.27767		-6.244	1.561	-5.27767		6.244	2.23	5.27767			0.5575		1.2488	0.39025	1.5833
9.32883	6.54133	24.6043		-9.32883	-1.04067	-24.6043		6.83867	2.676	20.739			0.2676		1.70967	0.21697	2.22204
12.5623	13.2313	50.0263		12.5623	-1.48666	2.30433		12.5623	7.359	10.8527		1.17772	0.748643	2.899		1.37981	0.98661
23.861	58.9463	40.809		23.861	-58.9463	-7.359		12.265	58.9463	10.258		1.65657		0.789077		2.23847	1.72825
34.342	18.732	4.014		31.22	18.732	0.892		9.143	18.732	0.892		2.60167	1.8732	0.446	0.39025		0.223
14.272	8.62266	13.157		-14.272	8.62266	-3.791		9.366	8.62266	4.683			0.862266	0.594667	1.8955		0.9366
15.164	4.906	8.474		-15.164	4.60867	4.46		15.164	4.75733	2.676			0.396444	1.338	1.5164	0.01037	0.223
17.171	16.502	3.122		-6.021	16.502	1.784		4.46	16.502	1.338		0.892	2.15244	0.446	0.892		0.446
20.07	28.767	9.0315		20.07	-28.767	-6.50417		20.07	10.258	4.19983		2.23		0.095571		1.85833	0.6244
14.718	24.307	3.86534		14.718	-24.307	-3.86534		14.718	10.258	3.86534		1.16195				2.3415	1.1596
11.596	17.9887	22.523		-11.596	17.9887	-1.561		11.596	17.9887	3.345			1.49906	0.6244	2.04635		1.04067
5.352	49.729	2.899		-3.568	-23.861	-2.899		2.23	22.523	2.007		0.1115	1.338		0.669	1.561	2.007
5.575	9.143	16.948		-3.345	-2.007	2.676		3.122	3.345	5.575		0.074333	1.115	1.39375	1.04067	0.47786	2.007
2.453	11.15	14.6437		-2.453	0	-14.6437		1.26367	2.007	14.6437			0.5575		0.223	2.007	1.56896
6.467	8.92	9.21733		5.129	-1.784	-9.21733		4.014	1.338	9.21733		1.0035	0.5575		0.669	0.446	3.07244
4.237	11.9677	21.5567		-1.561	11.9677	21.5567		0.892	11.9677	21.5567		0.223	0.39025	1.46977	0.446
11.819	12.8597	19.0293		10.481	-12.8597	-19.0293		6.467	12.8597	19.0293		1.2934			0.223	1.01524	2.03886
8.474	6.61567	16.056		-8.474	-6.61567	16.056		8.474	6.61567	16.056				2.676	0.68708	0.60142
19.0293	7.95367	19.178		-19.0293	7.95367	-19.178		19.0293	7.95367	19.178			0.554907		0.40488		2.73971
15.9073	3.122	3.122		15.9073	1.784	-2.23		15.9073	1.26367	1.115		0.454495	0.118469	0.223		0.06194	0.446
12.934	24.6787	8.028		-2.676	-15.4613	8.028		2.23	19.3267	6.467		0.892	0.532722	1.61675	0.5575	1.115
5.575	33.45	7.359		-0.223	-33.45	2.899		1.338	33.45	1.784		0.27875		0.892	0.669	1.54385	0.223
16.9108	25.199	13.157		-16.9108	-25.199	13.157		16.9108	25.199	13.157				1.87957	1.28437	2.79989
19.3267	35.903	36.572		-19.3267	-35.903	36.572		19.3267	15.833	6.913				6.244	0.96633	1.97913
11.0013	27.875	26.537		-11.0013	-27.875	-13.603		11.0013	23.861	8.028				3.791	0.8251	2.3861	0.72982
6.16967	50.175	16.056		-4.683	50.175	5.798		4.60867	14.718	5.798		0.162182	5.129	0.828286	0.86413		0.669
11.819	6.1325	7.359		-11.819	-0.3345	0.669		11.819	1.115	2.899			0.223	0.5798	1.47738	0.3345	0.5352
42.593	3.2335	12.265		42.593	-1.0035	12.265		25.868	2.1185	12.265		2.15567	0.118933	1.53313		0.52963
41.478	8.697	8.77133		-3.122	-5.798	-8.77133		12.488	1.6725	6.467		2.08133	0.083625		3.345	0.892	0.92386
24.753	8.251	9.366		-15.833	-2.007	-4.237		6.467	1.115	2.1185		0.5352	0.223	0.191143	2.23	0.892	0.50175
15.387	5.129	11.819		-2.007	-4.683	-3.568		6.244	4.906	3.122		1.115	0.004288	0.223	1.561	0.4906	0.59467
7.359	22.746	7.2475		7.359	20.962	4.5715		7.359	20.293	2.007		1.4718	1.69108	1.561		0.223	0.24327
8.54834	14.5693	14.495		0.669	14.5693	0.892		1.784	14.5693	2.007		0.223	1.61881	0.4014	0.3568		0.446
13.5287	7.73067	21.631		-2.82467	-2.52733	-0.223		3.71666	1.70967	2.23		0.579799	0.669	0.5798	0.69687	0.56989	0.7805
46.384	40.14	11.7075		46.384	0	-7.6935		10.927	19.624	8.5855		5.798	1.8509	0.5798		1.9624	1.43092
28.544	37.018	5.2405		-27.652	-37.018	-1.8955		8.92	25.199	1.4495		0.223		0.254857	1.784	1.784	0.5798
17.394	24.753	17.9515		-1.784	24.753	17.9515		3.122	24.753	17.9515		1.784	1.12514	1.79515	1.338
13.826	10.481	11.819		-13.826	-8.251	-11.819		5.352	7.136	11.819			0.446		4.906	1.18933	0.90915
8.028	3.122	8.1395		-1.338	-1.338	-8.1395		1.561	2.23	8.1395		0.297333	0.223		0.7805	0.83625	0.60293
12.042	20.07	9.589		4.906	20.07	0.223		4.46	20.07	2.007		0.5575	1.6273	0.308769	0.446		0.28671
14.1233	9.366	40.586		0.446	-0.892	-38.802		7.28467	5.129	26.2025		0.910583	1.13527	0.198222	1.07979	1.09907	1.02755
11.0013	14.1977	19.847		11.0013	-2.899	-19.847		11.0013	3.49367	19.847		1.00012	0.360231			0.41924	2.20522
9.21733	19.847	7.805		-9.21733	18.063	-1.115		9.21733	4.46	1.115			3.791	0.3345	1.53622	0.16725	0.5575
5.575	18.732	61.6967		1.561	4.46	19.178		1.115	7.136	30.4767		0.446	2.5645	2.12628	0.446	2.37867	1.33256
39.471	30.1793			-39.471	30.1793			39.471	30.1793				2.82931		2.07742
18.9178	10.6297			-18.9178	-10.6297			18.9178	10.6297						1.10201	1.32871
2.97333	7.136			-2.97333	-7.136			2.97333	6.244						0.74333	0.52033
39.694	29.882			-39.694	28.544			39.694	28.544				1.05719		1.52669	0.03431
37.241	32.781			37.241	-6.021			16.502	19.401			1.59817	1.115			1.76373
12.711	5.575			-12.711	1.115			12.711	0.669				0.446		2.5422	0.223
9.143	5.352			9.143	-0.892			9.143	1.784			1.14288	0.446			0.59467
6.69	5.575			-6.69	-0.223			3.791	1.561				0.3345		1.26367	0.892
11.373	8.697			3.19634	3.791			3.19634	3.791			1.04067	1.26367		0.63183	0.3345
11.373	4.237			6.467	2.007			4.683	1.561			1.4495	0.7805		0.29733	0.07433
18.732	12.488			17.84	12.488			7.582	12.488			1.26367	0.567636		0.446
7.805	9.143			-7.805	-0.892			7.805	1.115				0.4014		1.561	0.37167
5.129	21.631			-5.129	-21.631			5.129	21.631						1.0258	0.94048
19.178	11.15			-7.582	-3.122			13.38	3.345			0.796429	0.477857		1.6725	1.6725
7.805	24.1955			-0.223	24.1955			3.791	24.1955			2.453	0.96782		0.42122
18.286	19.624			-18.286	19.624			11.373	19.624				2.453		2.2746
25.868	16.056			-25.868	-16.056			25.868	10.258						2.15567	1.0258
15.164	14.941			-7.582	-14.941			8.028	6.021			0.3791			0.72982	4.237
2.676	12.265			1.338	-0.669			0.892	4.46			0.892	0.892		0.14867	1.05925
8.92	5.575			-6.244	0.223			4.237	1.784			0.446	0.446		2.1185	0.669
11.2243	8.028			11.2243	-0.446			11.2243	1.784			2.10456	1.338			1.784
9.06867	7.87933			9.06867	7.87933			9.06867	7.87933			1.94328	1.57587
15.387	31.5173			15.387	-3.41933			15.387	11.5217			2.19814	2.88042			0.93078
11.596	14.8667			11.596	14.8667			11.596	14.8667			2.899	1.43871
7.359	8.474			7.359	-4.014			7.359	3.791			0.4906	0.148667			0.5575
5.352	8.251			2.23	2.453			0.892	1.338			0.669	0.892		0.3345	0.223
9.589	10.927			2.899	1.115			1.784	1.338			0.371667	0.669		1.115	1.338
4.46	8.92			-1.784	4.014			0.669	4.014			0.223	0.8028		0.3345	0.669
6.244	16.279			-0.446	-1.115			1.561	2.23			0.5575	0.669		0.39025	1.338
8.77133	34.565			8.77133	-34.565			8.77133	18.509			1.54788				1.338
9.589	52.182			1.115	-52.182			2.899	36.349			0.72475			0.5575	0.98241
19.178	20.516			11.596	-20.516			8.474	10.258			1.0704			0.63183	10.258
12.7853	8.92			-12.7853	0.892			12.7853	2.453				1.115		0.87173	1.2265
6.913	10.035			6.913	-2.899			6.913	5.129			0.82956	0.7805			0.892
2.89901	21.185			2.453	21.185			1.70967	14.495			1.0258	1.81187		0.01062
8.028	25.199			8.028	-25.199			8.028	9.812			1.2042				1.61675
4.683	4.014			-1.115	1.784			0.892	1.338			0.1115	0.191143		0.223	0.446
7.06167	3.791			7.06167	3.345			7.06167	3.345			1.76542	0.669			0.01312
10.7783	28.321			10.7783	-19.847			10.7783	10.927			1.15482	1.115			1.561
21.4823	3.791			21.4823	-2.453			21.4823	2.676			1.26367	0.074333			0.446
9.81199	14.495			-0.446	14.495			1.93267	8.92			0.269947	2.97333		0.446
14.495	20.962			-14.495	-20.962			14.495	20.962						0.83625	2.0962
33.227	10.481			-31.889	-0.669			8.92	2.007			0.148667	0.371667		2.97333	0.223
12.042	4.83167			-8.474	1.41233			4.906	1.18933			0.371667	0.891999		1.63533	0.26355
7.359	4.60866			2.453	-2.52733			1.561	2.15567			0.669	0.390248		0.446	2.15567
11.15	12.8597			-1.784	6.16967			2.007	9.51467			0.371667	0.920774		0.892	0.83625
11.15	7.582			1.338	7.582			1.561	7.582			0.520333	1.5164		0.446
7.359	14.1605			2.453	4.1255			2.453	4.46			1.2265	0.892		0.5575	0.8028
10.1837	4.014			10.1837	1.784			10.1837	0.892			0.763775	0.446			0.446
7.87933	6.69			7.87933	-2.676			7.87933	3.791			0.59095	0.223			3.791
11.2243	14.272			1.85833	-8.92			1.85833	4.906			0.348438	0.5575		0.63714	1.561
	8.474				6.69				4.237				0.706167			0.14867
	15.387				2.007				2.23				1.115			0.59467
	7.136				0				2.007				0.3568			0.50175
	6.021				-2.007				1.338				0.297333			0.3345
	9.589				-9.589				5.575							1.39375
	7.582				-4.906				5.129				0.1115			1.28225
	17.394				-1.338				3.791				0.669			0.94775
	5.129				5.129				5.129				1.28225
	10.258				10.258				10.258				5.129
	15.4613				-9.366				12.265				1.14288			0.99446
	16.5763				-16.5763				16.5763							2.61732
	7.87934				7.87934				7.87934				1.07446
	8.697				8.697				8.697				1.63069
	12.4137				12.4137				11.0757				2.21513
	10.7783				-9.29167				8.028				0.223			1.2042
	13.826				-4.906				6.021				1.8955			0.75263
	28.098				28.098				28.098				4.014
	6.913				5.129				5.129				1.0258			0.1115
	16.056				5.798				3.345				1.115			1.115
	5.575				0.223				1.115				0.669			0.29733
	27.652				24.976				24.53				2.72556			0.446
	22.746				-22.3				21.631				0.005718			1.96645
	9.812				-0.892				1.48667				0.613249			0.31857
	22.8947				22.8947				22.8947				1.9624
	23.1177				-12.934				8.474				0.843522			1.33799
	18.732				18.732				18.732				2.4433
	37.018				-33.004				8.028				0.446			2.899
	6.913				6.913				6.913				0.987571
	7.582				-5.352				4.46				0.223			0.63714
	24.53				-24.084				20.293				0.1115			2.53663
	6.021				2.899				2.23				1.115			0.223
	8.251				-0.669				1.115				0.3345			0.37167
	24.976				22.3				10.704				1.784			0.19114
	6.021				-6.021				6.021							1.2042
	13.38				-13.38				13.38							1.6725
	11.819				0.223				1.115				0.892			1.115
	8.251				-4.683				3.345				0.223			1.6725
	31.22				-31.22				24.307							2.4307
	15.61				15.61				15.61				3.122
	15.0897				-15.0897				15.0897							2.05768
	4.46				-0.59467				1.338				0.175214			0.18583
	6.39267				-6.39267				5.575							0.45203
	17.4683				0.966333				5.798				0.5798			2.23
	10.035				1.115				2.23				0.669			0.3122
	34.119				-33.673				13.38				0.005186			3.345
	6.021				-1.561				2.007				0.223			0.669
	10.481				-8.251				3.122				0.669			0.669
	12.5623				-12.5623				12.5623							1.14203
	11.596				-11.596				11.596							0.79064
	8.54833				8.54833				8.54833				1.70967
	8.251				-8.251				8.251							1.6502
	5.129				5.129				4.906				4.906
	12.934				-12.934				12.934							1.43711
	7.65633				-0.52033				1.115				0.250875			0.10665
	12.1163				-0.52033				2.23				0.278751			0.446
19.9213	7.136	5.94667		10.8527	-1.93267	0.892		10.5553	3.19633	1.70967		2.52733	0.371667	0.3345	1.94328	0.28203	0.56989
8.251	3.122	2.82467		-0.223	-3.122	-2.82467		1.04067	2.52733	2.23		0.3122			0.5352	0.26145	0.27875
4.46	10.5553	6.244		-0.446	10.5553	-6.244		2.007	4.98033	6.244		0.14495	0.4014		0.27368		0.6244
3.64233	10.5553	8.99433		2.60167	10.5553	-8.99433		1.85833	10.3323	8.99433		0.428846	1.10704		0.1115		0.49969
10.6297	18.955	4.60867		0.966333	18.3603	4.60867		5.798	18.063	4.60867		0.756261	1.23157	0.55304	0.50175	0.09557
30.105	15.0525	7.805		8.10233	-14.1605	7.805		4.46	9.55183	7.805		1.16456	0.1338	0.7805	0.72475	0.6244
7.87934	10.035	6.913		-6.39267	8.39967	6.913		3.49367	8.39967	6.913		0.139375	1.25995	0.576083	0.27582	0.30662
10.927	9.51467	4.237		0.074333	9.51467	4.237		2.52733	9.51467	1.561		0.6244	1.50232	0.148667	0.27875
3.86533	17.9143	11.2243		-2.08133	-17.9143	-6.467		1.41233	17.9143	2.08133		0.148667		0.328632	0.4237	0.89572	0.37739
6.98733	8.54833	11.15		6.98733	-8.54833	0.743333		6.98733	8.54833	2.007		0.499095		0.3345		1.16568	0.446
5.94667	11.596	18.286		5.94667	0.743334	18.286		5.94667	4.906	18.286		0.495556	0.492138	1.44363		0.77463
25.2733	4.906	8.474		25.2733	-1.784	-0.892		13.5287	1.48667	3.345		0.600385	0.091823	0.271216		0.446	0.63469
6.98733	4.906	3.568		-6.98733	-0.892	1.93267		6.98733	2.37866	1.04067			0.191143	0.173444	0.80623	0.59467	0.13938
10.927	29.5847	9.21733		-10.927	29.5847	-9.21733		10.927	29.5847	9.21733			1.13787		1.17075		0.65838
5.94667	5.05466	2.49017		-5.94667	-4.16266	2.49017		5.94667	3.64233	1.04067			0.095571	0.223	0.446	0.7805
11.6703	12.1163	8.84567		9.589	1.561	7.95367		4.31133	4.014	3.19633		0.46384	1.0035	0.43485	0.1561	0.7582	0.2676
7.136	5.42634	4.08833		-3.122	-2.52733	-0.81767		2.23	1.18933	2.23		0.427417	0.1561	0.090852	0.60818	0.7805	0.39353
8.474	9.73767	10.258		-5.50067	-9.73767	-10.258		5.42633	4.31133	10.258		0.3122			0.60293	0.76457	0.78908
6.83867	46.5327	3.86533		-2.37867	1.04067	-1.784		2.23	10.4067	1.561		0.322111	1.115	0.16725	0.52033	0.67385	0.18583
4.75733	13.6773	8.99433		-4.75733	13.6773	-1.70967		4.75733	13.6773	1.70967			1.0521	0.201762	0.31026		0.28494
11.0013	9.143	9.51467		-11.0013	9.143	3.41933		11.0013	9.143	1.784			1.30614	0.371667	0.94297		0.4906
10.258	4.53433	5.64933		10.258	-4.53433	5.64933		10.258	4.53433	5.64933		0.961688		1.30369		0.56679
8.32533	13.0083	8.92		-0.14867	-13.0083	-2.676		2.23	11.2243	3.04767		0.39353		0.3568	0.5352	1.02039	0.50794
9.55183	27.3547	10.8527		-0.85483	-13.9747	3.71667		1.338	9.66334	2.453		0.27875	0.847403	0.4906	0.446	2.00698	0.47388
43.1877	4.16267	16.2047		7.06167	4.16267	13.0827		17.617	4.16267	5.798		1.23579	0.378424	0.594667	1.12449		0.26017
13.0827	10.1465	8.697		13.0827	-6.1325	1.85833		7.73067	6.5785	1.18933		1.0704	0.27875	0.223		0.62652	0.27875
7.359	6.69	12.8597		-5.129	-1.115	-9.589		3.345	2.007	1.784		0.223	0.2676	0.16725	0.60818	0.29733	0.50175
8.62267	13.4915	6.98733		-6.98733	2.5645	6.98733		5.05467	3.6795	4.83167		0.093895	0.854833	1.03536	1.5164	1.2265
8.028	32.558	12.5623		8.028	2.676	12.5623		8.028	14.941	12.5623		1.26758	1.13284	1.34596		1.03041
5.352	11.819	9.51467		5.352	-11.819	-2.08133		5.352	11.819	3.41933		0.845053		0.148667		1.07445	0.5129
8.028	12.934	8.028		-8.028	-2.453	8.028		8.028	4.3485	4.46			0.966333	0.764572	0.96336	1.37517
29.7333	24.4185	13.38		29.7333	-3.4565	-4.16267		29.7333	13.7145	4.86883		1.02529	1.3157	0.446001		0.80674	1.3911
23.2663	15.7215	6.83867		-23.2663	5.2405	-0.892		23.2663	6.8015	1.93267			1.18933	0.250875	1.31696	0.41976	0.3345
16.056	24.4185	9.06867		-16.056	24.4185	-9.06867		16.056	24.4185	9.06867			1.28518		1.04713		0.68015
3.04766	4.1255	3.6795		-3.04766	-4.1255	2.5645		3.04766	4.1255	2.7875				0.929167	0.9143	0.55007	0.06969
7.359	5.352	6.467		7.359	5.352	0.074332		7.359	5.352	1.63534		0.669	1.18933	0.446001			0.4906
3.64233	13.7145	3.791		-1.561	-13.7145	-2.30433		1.70967	13.7145	2.453		0.074334		0.125438	0.5129	0.97961	0.29436
11.6703	9.4775	4.906		5.27767	9.4775	3.71667		3.71667	8.1395	1.26367		0.520334	1.01744	0.344636	0.52034		0.12008
8.17667	11.596	5.798		-0.446	8.92	-2.676		2.453	4.7945	1.26367		0.3122	1.59817	0.198222	0.669	0.19822	0.42122
6.69	25.422	9.73767		0.446	-25.422	-3.64233		1.48667	25.422	2.97333		0.247778		0.637143	0.32592	2.1185	1.2042
10.6297	5.94667	4.237		-2.007	1.48667	4.237		4.31133	1.63534	4.16267		0.417226	0.445999	0.542957	0.46193	0.4014
3.08483	10.5553	7.43333		-2.3415	-1.93267	-7.43333		1.93267	2.52734	7.43333		0.03345	0.3345		0.64422	0.63183	0.92917
14.1233	6.76434	4.75733		-14.1233	-0.52034	-1.93267		14.1233	2.453	1.561			0.195125	0.12488	1.17694	0.61325	0.23893
14.495	4.75734	12.0048		-11.2243	0	6.28117		9.96067	2.15567	7.136		0.3122	0.3345	0.475733	1.14931	0.34037	0.24424
8.474	9.143	8.697		-5.798	-1.115	8.697		6.61567	2.30433	8.697		0.223	0.230433	0.767382	0.99235	0.64112
14.0118	35.8287	8.62266		-9.9235	35.8287	3.568		3.41933	28.767	3.122		0.177256	1.32771	0.585374	1.05925		0.2676
20.5903	17.3197	18.2117		20.5903	6.467	-18.2117		20.5903	5.575	15.0897		1.01264	1.39375			0.669	1.10412
23.415	17.84	6.39267		4.38567	3.27067	-6.39267		13.9003	3.27067	6.39267		1.15836	0.8474		2.59491	0.46724	1.27853
15.5357	9.06867			11.9677	7.73067			9.99783	2.30433			0.689506	0.460867		2.67601	0.1338
6.244	7.65633			6.244	7.65633			6.244	7.06167			1.04067	0.481477
8.028	12.711			-8.028	-0.14867			8.028	4.31133				0.923857		1.26758	0.4237
11.7818	6.76433			-11.3358	-1.561			10.5182	2.15567			0.083625	0.408833		1.61818	1.78399
	6.09533				3.71667				3.791				0.56865			0.1338
	3.568				2.676				2.08133				0.480308			0.446
	11.2987				-3.122				2.82467				0.185833			0.5575
	8.62267				2.08133				1.85833				0.619445			2.899
	7.50767				2.15567				2.08133				0.362375			0.7582
	6.76433				-1.561				1.70967				0.14495			0.36636
	13.2313				-2.97333				3.93967				0.392905			0.43007
	9.44033				9.44033				5.94667				1.07783
	11.15				11.15				11.15				0.696875
	7.73067				-4.31133				1.41233				0.120077			0.4014
	10.035				-3.64233				5.72367				0.144294			0.81767
	6.76433				6.76433				6.76433				0.699758
	30.1793				30.1793				30.1793				0.675657
	22.077				22.077				22.077				1.50525
	9.29167				9.29167				9.29167				1.115
	18.955				-18.955				18.955							1.09356
	8.697				-8.697				8.697							1.08713
	16.7993				2.82467				9.812				1.338			1.31013
	6.021				-2.30433				1.561				0.129105			0.7805
	18.6577				6.61567				12.3393				1.27648			0.69688
	32.6323				6.76433				18.1373				1.29552			1.0258
	18.5833				2.37867				5.27767				0.659304			1.338
	12.4137				12.4137				12.4137				1.3793
	6.98733				-3.568				3.49367				0.346889			1.04067
	9.73767				-2.30433				1.41233				0.325923			0.669
	3.568				-3.568				2.453							0.40883
	8.92				-0.669				0.892				0.2676			0.223
	10.927				1.41233				3.19633				0.639266			0.29733
	33.004				3.568				14.718				1.8955			1.37981
	54.9323				54.9323				54.9323				1.7347
	13.826				-13.826				13.826							1.72825
	21.854				21.854				21.854				1.31124
	8.54833				-8.54833				8.54833							1.70967
	12.8597				-12.8597				12.8597							1.48381
	38.2817				7.06167				8.697				1.57587			1.00349
	18.286				18.286				18.286				1.44363
	43.6337				-1.41233				6.98733				1.115			1.61675
	7.06166				1.85833				1.48666				0.39025			0.669
	28.5068				28.5068				28.5068				1.24847
	9.589				-9.589				9.589							0.84609
	12.6738				12.6738				12.6738				0.685072
	7.805				-7.805				7.805							0.86722
	9.06867				-9.06867				9.06867							1.70038
	15.9817				-15.9817				15.9817							0.5575
	19.847				-19.847				19.847							2.05314
	24.0097				24.0097				18.8807				2.02293
	21.631				21.631				21.631				1.96646
	11.373				-0.07433				1.338				0.350428			0.2899
	8.65983				4.64583				4.05117				0.385825			0.36238
	15.9073				15.9073				6.69				1.4718
	13.157				-13.157				13.157							1.40968
	12.488				-0.14867				6.31833				1.115			1.45808
	7.50767				-7.50767				7.50767							1.07252
	15.61				9.44033				6.05817				1.72825			1.68263
	6.467				-6.467				6.467							1.14124
	10.704				10.704				10.704				1.18933
	13.3057				13.3057				13.3057				2.21761
	5.129				0.594666				2.71317				0.361755			0.31482
	7.87933				1.338				1.115				0.557501			0.2676
	8.77133				-7.87933				5.575				0.0892			1.115
	4.08833				1.561				1.784				0.223			0.25731
	5.94667				-4.906				4.31133				0.053095			0.58791
	13.5287				-1.93267				2.453				0.459937			0.95571
	10.7783				-10.7783				8.92							0.83625
	11.4473				11.4473				11.4473				1.32085
	15.3127				-15.3127				15.3127							1.64064
	7.359				7.359				7.359				1.4718
	11.2987				-11.2987				11.2987							1.54073
	7.87933				-7.87933				7.87933							1.1819
	24.1583				24.1583				24.1583				1.57554
	4.1255				-0.5575				1.561				0.3122			0.40883
	7.582				-2.23				1.561				0.161056			0.2899
	15.2755				-15.2755				14.941							0.48197
	16.3905				-16.3905				16.3905							2.04881
	5.352				0.669				1.8955				0.173444			0.17344
	58.649				2.899				17.84				1.561			1.37231
	17.84				-8.697				11.7075				0.7136			0.90058
	12.042				-11.373				7.582				0.029087			1.37855
	59.2065				51.1785				52.5165				1.25039			0.72982
	28.098				6.021				17.0595				0.922135			1.08876
	16.056				8.474				12.265				0.908519			1.8955
	62.3285				5.6865				34.0075				1.94329			1.57587
	18.732				-18.732				18.732							1.44092
	13.2685				-13.2685				13.2685							1.15378
	21.185				-21.185				21.185							1.46103
	4.31133				4.014				2.60167				0.975623			0.03431

## Sheet: C
	Stationary	Oscillatory	Bidirectional	Anterograde	Retrograde
KIF5B shRNA	54.902	18.7364	5.88235	9.47712	11.0022
KIF5A shRNA	46.0123	22.4949	6.40763	11.7928	13.2924
Control shRNA	64.0993	16.4863	3.88288	7.25652	8.27498
