# Supplementary material for: Specific depletion of the motor protein KIF5B leads to deficits in dendritic transport, synaptic plasticity and memory
Source: eLife journal article supplement (doi:10.7554/elife.53456), 2020-01-21
Supplement: supp [file elife-53456-supp-v1.zip › elife_poa_e53456_Figure_3_source_data_1.xlsx]

## Sheet: D
Total density				Stationary density				Oscillatory density				Bidirectional density				Anterograde density			Retrograde density
Control shRNA	KIF5A shRNA	KIF5B shRNA		Control shRNA	KIF5A shRNA	KIF5B shRNA		Control shRNA	KIF5A shRNA	KIF5B shRNA		Control shRNA	KIF5A shRNA	KIF5B shRNA		Control shRNA	KIF5A shRNA	KIF5B shRNA	Control shRNA	KIF5A shRNA	KIF5B shRNA
5.15488	5.04484	1.97917		3.37687	1.96188	1.69503		0.954569	1.96188	0.160105		0.126702	0	0		0.334406	0	0	0.362335	1.12108	0.124032
4.35974	3.26671	3.54544		2.80269	2.07882	1.02176		1.24564	0.593948	1.78973		0	0	0.304826		0	0	0.21456	0.31141	0.593948	0.21456
3.87833	4.14364	4.21178		3.05169	1.90982	1.73426		0.236384	0.839812	0.495503		0.087514	0.431726	0.495503		0.259316	0.277737	0.743255	0.243432	0.684546	0.743255
5.08677	4.2671	5.79436		3.74064	2.46409	2.27463		0.546399	1.04194	1.41242		0.138344	0.111041	0.862215		0.377294	0.253697	0.51477	0.28409	0.396329	0.730323
5.47508	4.62373	3.24336		3.30818	2.99962	2.82032		0.700663	0.999118	0.282032		0.43018	0.108842	0		0.586047	0.156548	0	0.450014	0.359598	0.141016
5.09445	4.19964	3.54171		3.05425	1.69576	2.40496		0.985424	0.930646	0.601572		0.096496	0.079509	0		0.39055	0.483571	0.312074	0.567739	1.01015	0.2231
5.22674	5.30581	2.05072		3.12303	2.11253	1.37458		0.861564	1.5471	0.435049		0.349022	0.254007	0.120546		0.421738	0.797989	0	0.47139	0.594187	0.120546
5.68249	6.58421	4.19351		3.52338	2.92356	1.99934		1.09142	1.30439	0.841343		0.249128	0.72239	0.279971		0.355897	0.636362	0.372358	0.462666	0.997501	0.700494
4.35082	3.57609	4.65233		2.75985	1.36257	1.86957		0.882215	0.579004	1.16308		0.105483	0.289502	0.369015		0.203513	0.709525	0.475279	0.399762	0.635482	0.775389
5.47536	4.80665	5.45205		3.11421	1.81034	2.19266		0.93571	1.27459	1.63117		0.29809	0.804791	0.410737		0.550244	0.315012	0.564432	0.577104	0.601917	0.653057
5.79788	5.9159	4.28525		2.65462	2.09755	2.043		1.40485	1.67255	0.59666		0.327006	0.245604	0.279142		0.605952	1.00768	0.609322	0.805458	0.892512	0.757125
5.42517	5.79622	4.55312		3.85563	2.60792	2.4364		0.873563	1.16869	0.519623		0.35919	0.328099	0.217908		0.25555	0.831516	0.727966	0.081237	0.859992	0.651221
3.62677	3.94538	3.37404		2.76592	1.42964	2.37505		0.410448	1.13155	0.311248		0	0.406393	0.085906		0.141534	0.393875	0.344121	0.308872	0.583918	0.257719
4.22093	6.55074	3.36971		2.59049	3.084	2.59208		1.0934	1.21636	0.259208		0.268521	0.423194	0.259208		0.268521	0.870046	0	0	0.95714	0.259208
5.0334	4.96856	1.9668		3.20308	2.66951	1.18008		1.83033	0.793273	0.39336		0	0.277126	0		0	0.829112	0.39336	0	0.399538	0
3.07056	5.62256	1.13527		1.61726	2.3514	1.13527		0.981767	1.46308	0		0	0.33284	0		0.173139	0.834459	0	0.298399	0.640785	0
5.68757	6.60848	3.58287		3.2042	2.6937	1.54597		0.735875	1.21319	0.985631		0.211524	0.68392	0.324856		0.591356	0.710114	0.378136	0.944622	1.30756	0.348275
	3.4792	4.98196			2.70605	3.48949			0.386578	0.821952			0	0.081434			0.386578	0.289195		0	0.299894
	1.90188				1.32539				0.576488				0				0			0

## Sheet: E
Camk2a distribution
Bin	Control shRNA												KIF5A shRNA																					KIF5B shRNA
0	1	1	1	1	1	1	1	1	1	1	1		1	1	1	1	1	1	1	1	1	1	1	1	1	1	1	1	1	1	1	1		1	1	1	1	1	1	1	1	1	1	1
1	1	1.625	0.5	0.25	1	0	1.33333	0.291667	2	0	0		1	1	2	0	0.733333	0.666667	1.2	0.666667	0.516667	0.333333	0	0.233333	1.33333	1	0	5	0.4	0.5	2	0.25		0.666667	0.333333	1	0.714286	0.166667	1	0	0	2	0.5	0.25
2	0	1.25	0.666667	0.625	1	0.5	0.333333	1.125	0.75	0.6	1		1.2	1.5	3	0	0.733333	2.5	0.6	0	0.35	0.333333	0.333333	0.166667	0.333333	1.5	0	1	0	0.5	1	0.25		0.3	0.333333	0	0	0	0	1	0	2	0.5	0
3	1	0.75	0	0.196429	1.16667	0	1	0.291667	0.583333	0	1		1	0.25	2	0	0.633333	2.16667	0.2	0.666667	0.183333	0.666667	0	0.166667	0.333333	1	0	0	0.2	1	1	0.25		0	0	0	0	0.333333	0	0	0	1	0	0
4	2	0.125	0	0.196429	1.5	1	0.333333	0.125	1	0.4	1		0.4	0.25	0	0	0.666667	0.5	0	0	0.083333	0	0	0.066667	0.333333	0	0	0	0	0.625	2	0		0	0	0	0.142857	0.166667	0	0	0	1	0	0
5	0	0.25	0	0.071429	0.666667	2	0	0.416667	0.416667	0.4	2		0.2	0.25	1	0	0.333333	0.666667	0	0	0.183333	0	0	0	0.333333	0	0	0	0.2	0	0	0.75		0	0	0	0	0	0	0	0.5	0	0.5	0
6	0	0.25	0	0.142857	1.33333	1	0.333333	0.166667	0	0	1		0.2	0.25	1	0	0.733333	0.166667	0.4	0	0.166667	0.333333	0	0.166667	0.333333	0	0	0	0	0	2	0.75		0.166667	0	0	0.142857	0	0	0	0	1	0.5	0
7	0	0	0	0	0.666667	1	0	0.291667	0.75	0	0		0.2	0	0	0	0.5	1.16667	0.2	0.333333	0.283333	0	0.333333	0.166667	0.333333	0	0	0	0	0.625	0	0		0.166667	0	0	0	0.166667	0	0	0	0	0	0
8	1	0.25	0	0	0.666667	0	0	0	0.416667	0.4	0		0	0	0	0	0.833333	0	0	0.666667	0.566667	0.333333	0	0.166667	0	0	0	0	0	0	0	0.5		0.733333	0	0	0	0	0	0	0	0	0	0
9	1	0	0	0.071429	0.166667	0.5	0.666667	0.333333	0.75	0.6	0		0.4	0	0	0	0.066667	0.5	0	0	0.1	0.333333	0	0	0.666667	0	0	0	0	0	0	0.25		0.2	0	0	0	0	0	0	0.5	0	0	0
10	0	0.125	0	0	0.333333	0.5	0.333333	0.166667	0.5	0.6	0		0.2	0.25	0	0	0	0	0.2	0	0.1	0	0	0	0.666667	0	0	0	0	1	0	0		0.466667	0	0	0.142857	0	0	1	0	0	0.5	0
11	1	0	0.166667	0.125	0.666667	0.5	1	0	0	1	0		0	0.75	0	0	0	0	0.2	0	0.2	0.666667	0	0	0	0	0	0	0	0.25	0	0.25		0.233333	0	0	0	0	0	1	0.5	1	0.5	0
12	0	0.125	0	0	1.66667	0	0	0.166667	0.166667	0.4	0		0	0.5	0	0	0.066667	0	0	0	0.183333	0.333333	0	0	0	0	0	0	0	0	0	0		0.333333	0	0	0	0	0	0	0	1	0	0
13	0	0.125	0	0.071429	0	0	0.333333	0.166667	0	0.6	1		0	0.5	0	0	0.333333	0	0	0	0.083333	0	0	0	0.333333	0	0	0	0	0	1	0.5		0	0	0	0.285714	0	0	0	0.5	0	0	0
14	0	0	0	0	0.5	0.5	0.666667	0.625	0	0.8	0		0	0	0	0	0.566667	0	0	0	0.183333	0	0	0	0.333333	0	0	0	0	0	0	0		0.466667	0	0	0.428571	0	0	0	0	0	0	0
15	0	0	0	0.196429	0.666667	0.5	0.666667	0	0.166667	0.4	0		0	1.5	0	0	0.666667	0	0.2	0	0.266667	0.333333	0	0	0.333333	0	0	0	0	0	0	0.5		0.166667	0	0	0	0	0	0	0	0	0	0
Grin2b distribution
Bin	Control shRNA													KIF5A shRNA																			KIF5B shRNA
0	1	1	1	1	1	1	1	1	1	1	1	1		1	1	1	1	1	1	1	1	1	1	1	1	1	1	1	1	1	1		1	1	1	1	1	1	1	1	1	1	1	1	1
1	0.25	1	0.2	1	1.16667	1.25	2	1.33333	0.4	0.875	0.5	0.25		0.833333	0.5	1	0.5	0.1	1	0.5	0.25	1.16667	0.75	0	1	0	0.333333	0.25	4	1	0.666667		0	0	1	0	0	0	0	0	1	0	0.5	0	0
2	0	0	0.1	0	0.166667	0.166667	3	0.666667	0.4	0.458333	1	0		0.166667	0.5	0	1	0.0625	0.5	0	0	0.333333	0.375	0	0.333333	0	0	0.5	8	0.5	1		0.071429	0	0	0	0	0	0	0	1	0	0.5	0	0
3	0.5	0	0.1	0	0.541667	0.333333	1	2	0.5	0.291667	0	0.25		0	0	0	0	0	1	0	0	0.166667	0	0	0	0	0.333333	0.75	4	0.5	0		0	0	0	0	0	0	0.142857	0	0	0	0.5	0	0
4	0	0	0.5	0	0.25	0.166667	0	0.333333	0	0.166667	1	0		0	0	1	0	0	0	0	0	0.166667	0	0	0	0	0	0.25	1	0	0		0	0	0	0	0	0	0	0	0	0	0.5	1	0
5	0	0	0	0	0.166667	0.166667	2	0.333333	0	0.291667	1	0.5		0	0	0	0.5	0	0	0	0	0.166667	0	0	0	0	0	0	1	1	0.333333		0	0	0	0	0	0	0	0	0	0	0.5	0	0
6	0.25	0	0	0	0	0.083333	0	0.333333	0	0	0	0		0	0	0	0.5	0.1	0	0	0	0	0	0	0	0	0	0	1	2	0		0.071429	0	0	0	0	0	0	0	0	0	0.5	0	0
7	0.5	1	0	0	0	0	0	0	0.1	0.125	0.5	0		0	0	0	0	0.1	0	0.5	0	0	0	0	0	0	0	0.25	0	0	0.333333		0	0	0	0	0	0	0	0	0	0	0	0	0
8	0	0	0	0	0	0.166667	0	0	0	0.166667	2	0		0	0	0	0	0.1	0	0	0	0	0	0	0	0	0	0	0	1	0		0	0	0	0	0	0	0	0	0	0	0	0	0
9	0.5	0	0	0	0	0	0	0.333333	0	0	1	0		0	0	0	0	0	0	0	0	0	0	0	0	0	0	0	0	0	0.666667		0.25	0	0	0	1	0	0	0	0	0.5	0	0	0
10	0	0	0	0	0	0	0	0.333333	0	0.125	2	0		0	0	0	0	0	0	0	0	0	0	0	0	0	0	0.25	0	0	0		0	0	0	0	0	0	0	0	1	0	0	0	0
11	0	0	0	0	0	0.166667	0	0.333333	0	0	1	0		0	0	0	0	0.1	0	0	0	0	0	0	0	0	0	0	0	0	0		0	0	0	0	0	0	0	0	0	0.5	0	0	0
12	0	0	0	0	0	0	0	0	0	0	0.5	0		0	0	0	0	0	0	0	0	0	0	0	0	0	0	0	0	0	0.666667		0	0	0	0	0	0	0	0	0	0	0	0	0
13	0	0	0.5	0	0	0	0	0.333333	0	0	2	0		0	0	0	0	0	0.5	0	0	0	0	0	0	0	0	0	1	0.5	0		0.25	0	0	0	0	0	0	0	0	1	0	0	0
14	0	0	0	0	0	0	0	0.333333	0	0	1	0		0	0	0	0	0	0	0	0	0	0	0	0	0	0	0	0	0	0		0	0	0	0	0	0	0.142857	0	0	0	0	0	0
15	0.25	0	0	0	0	0	0	1	0	0.166667	0.5	0		0	0	0	0	0	0	0	0	0	0	0	0	0	0	0	0	0	0.333333		0	0	0	0	0	0	0	0	0	0.5	0	0	0
Camk2a density				Grin2b density
Control shRNA	KIF5A shRNA	KIF5B shRNA		Control shRNA	KIF5A shRNA	KIF5B shRNA
0.058275	0.242893	0.119786		0.019425	0.100508	0.051735
0.09903	0.119065	0.030796		0.035588	0.009914	0.009638
0.239342	0.031345	0.074455		0.027008	0.017567	0.016943
0.144595	0.16813	0.200815		0.063619	0.018987	0.012025
0.148472	0.109328	0.089174		0.020656	0.07524	0.008783
0.204728	0.216316	0.05196		0.102408	0.065347	0.012409
0.125516	0.094402	0.05196		0.126054	0.08097	0.090367
0.289352	0.192749	0.058135		0.059769	0.103806	0
0.151569	0.172061	0.119964		0.333193	0.021414	0.031176
0.211668	0.081437	0.080647		0.067485	0.161473	0.041568
0.172068	0.067165	0.032086		0.114147	0.195133	0.065402
0.074884	0.188385	0.016595		0.131726	0.011249	0.083975
	0.103306	0.033942		0.074884	0.092791	0.100808
	0.007832				0.019614	0.013094
	0.046396				0.008362	0.038722
	0.009807				0.044238	0.006788
	0				0.080124
	0.066357				0.18872
	0.089951				0.170481
	0.098853				0.11375
	0.234412
	0.02275
