# Supplementary material for: Specific depletion of the motor protein KIF5B leads to deficits in dendritic transport, synaptic plasticity and memory
Source: eLife journal article supplement (doi:10.7554/elife.53456), 2020-01-21
Supplement: supp [file elife-53456-supp-v1.zip › elife_poa_e53456_Figure_5_source_data_1.xlsx]

## Sheet: E
FMRP				G3BP1
WT	R941/956H			WT	R941/956H
100	83.4744			100	44.6951
100	41.2704			100	35.7856
100	67.8374			100	49.7972
100	76.8132
100	51.6849

## Sheet: F
scr	kif5bsh	kif5bsh+WT	kif5bsh+DM
2.65693	1.89637	1.64562	2.05998
2.81863	1.12369	1.50353	1.80618
2.26379	1.2752	2.12453	1.41576
1.58039	1.42142	1.81161	2.66511
2.10286	1.28597	3.98775	1.44022
2.21812	1.98372	2.52707	1.88055
3.26814	1.84698	1.51539	1.24087
1.50799	1.37312	2.3322	0.723524
2.38786	0.881663	2.61653	0.552959
2.70858	2.097	1.34961	1.33029
1.80979	0.714709	1.51217	1.85185
1.40047	0.883303	2.88641	2.62244
2.27161	1.43897	1.67521	1.70576
1.79501	1.8841	3.29	1.82081
1.2862	1.19406	1.53354	1.05063
2.16879	1.9131	1.19798	1.60057
2.00617	1.3647	2.24728	1.19126
2.6734	1.21244	2.39982	2.1015
2.59946	1.7069	1.73316	1.6259
2.42279	1.11793	1.92566	1.03072
1.44611	1.81598	1.45908	1.36749
1.93726	1.51287	1.75241	1.49686
2.3415	1.60087	1.67986	0.800926
2.46561	1.11895	2.88455	1.74302
3.85298	1.86156	2.25592	0.317842
1.87055	1.71006	1.79159	1.44835
1.45533	1.47171	1.92887	0.959032
2.15671	1.92616	1.32888	1.22859
2.83186	1.84762	1.38977	1.82925
1.45271	2.39467	2.38401	0.809262
2.86054	0.71612	2.09532	1.37032
1.02664	1.74929	2.43294	0.944503
1.61004	1.28785	1.42869	0.588539
1.44722	0.969194	1.99734	1.26644
1.9389	1.98111	2.2654	1.26878
1.77068		1.45275
1.29174		3.9238
		1.98962

## Sheet: G
frequency					amplitude
kif5bsh	kif5bsh+WT	kif5bsh+DM			kif5bsh	kif5bsh+WT	kif5bsh+DM
0.580328	0.576364	1.03855			14.286	13.643	10.203
0.011594	1.44262	0.419672			9.155	10.579	10.574
0.157377	0.134426	0.078689			11.196	9.483	12.067
0.037705	1.20492	0.193333			8.943	20.497	13.154
0.350814	0.521311	0.240984			9.681	10.219	10.471
0.108197	0.688245	0.255738			9.858	11.331	9.378
0.016667	0.360656	0.398361			6.51	10.032	11.489
0.008197	0.154098	0.209836			6.836	7.85	7.92
0.013115	0.152459	0.4			7.019	6.484	9.538
0.162	0.098361	0.106557			7.618	7.67	9.352
0.329508	0.734426	0.416393			9.939	9.756	10.446
0.106557	1.14375	0.418033			9.906	10.452	10.007
0.467213	0.370492	0.632787			12.053	10.16	11.68
	1.40656					12.775
