# Supplementary material for: Specific depletion of the motor protein KIF5B leads to deficits in dendritic transport, synaptic plasticity and memory
Source: eLife journal article supplement (doi:10.7554/elife.53456), 2020-01-21
Supplement: supp [file elife-53456-supp-v1.zip › elife_poa_e53456_Figure_6_figure_supplement_1_source_data_1.xlsx]

## Sheet: C
Frontal association cortex
Bin	WT				Homo
1	13	15	18		10	10	11
2	89	124	128		38	89	113
3	158	152	198		106	159	128
4	147	147	166		88	141	104
5	109	131	120		88	94	87
6	96	89	102		96	91	101
7	115	101	115		72	108	116
8	118	136	124		68	112	128
9	129	124	119		93	114	121
10	118	121	142		88	137	118
11	137	136	140		86	133	13
12	117	125	151		98	107	130
13	114	128	172		100	119	124
14	103	135	179		78	141	115
15	122	141	173		88	141	118
16	124	148	154		40	134	113
17	140	156	161		6	149	131
18	131	123	170		0	144	117
19	92	41	166		0	120	92
20	92	5	142		0	104	73
21	68	9	98		0	78	0

## Sheet: D
primary somatosensory cortex
Bin	WT				Homo
1	27	60	8		48	12	17
2	157	188	99		148	124	130
3	192	194	160		167	144	131
4	182	198	162		13	171	149
5	145	155	113		220	99	160
6	122	150	143		168	87	96
7	117	187	180		158	102	95
8	154	220	188		143	101	114
9	163	210	173		138	79	105
10	165	168	64		155	41	26
11	134	16	0		115	8	9
12	9	0	0		52	0	0
13	2	0	0		1	0	0
