# Supplementary material for: Specific depletion of the motor protein KIF5B leads to deficits in dendritic transport, synaptic plasticity and memory
Source: eLife journal article supplement (doi:10.7554/elife.53456), 2020-01-21
Supplement: supp [file elife-53456-supp-v1.zip › elife_poa_e53456_Figure_6_figure_supplement_2_source_data_1.xlsx]

## Sheet: Sheet1
KIF5B			KIF17
WT	Hom		WT	Hom
0.939278	0.583175		1.26035	1.04769
0.88933	0.641907		1.03497	0.949571
1.17139	0.681893		0.704686	0.694866
