# Supplementary material for: Specific depletion of the motor protein KIF5B leads to deficits in dendritic transport, synaptic plasticity and memory
Source: eLife journal article supplement (doi:10.7554/elife.53456), 2020-01-21
Supplement: supp [file elife-53456-supp-v1.zip › elife_poa_e53456_Figure_6_source_data_1.xlsx]

## Sheet: B
KIF5A			KIF5B			KIF5C
Hetero	Homo		Hetero	Homo		Hetero	Homo
1.09449	1.10979		1.01354	0.419944		0.831856	0.88033
0.94259	1.1865		0.506372	0.51166		0.877676	1.04838
0.851837	0.682166		0.669339	0.675864		0.857683	1.06503
			0.907054	0.672328
			0.891971	0.714586
			1.03492	0.698931

## Sheet: C
WT	Homo
1.01286	0.540924
0.987136	0.567483
1.01279	0.393958
