# Supplementary material for: Specific depletion of the motor protein KIF5B leads to deficits in dendritic transport, synaptic plasticity and memory
Source: eLife journal article supplement (doi:10.7554/elife.53456), 2020-01-21
Supplement: supp [file elife-53456-supp-v1.zip › elife_poa_e53456_Figure_7_figure_supplement_1_source_data_1.xlsx]

## Sheet: Sheet1
WT	Hetero	Homo
47.4	47.6	58
53	21	48
50	76.9	38
74	33.3	59
56	22.2	42
53	66.7	44
