# Supplementary material for: Specific depletion of the motor protein KIF5B leads to deficits in dendritic transport, synaptic plasticity and memory
Source: eLife journal article supplement (doi:10.7554/elife.53456), 2020-01-21
Supplement: supp [file elife-53456-supp-v1.zip › elife_poa_e53456_Figure_7_source_data_1.xlsx]

## Sheet: B
WT	Homo
12.3275	20.3897
13.5885	10.6494
12.4476	13.5446
15.9079	12.2632
18.0692	10.8263
15.806	9.69963
20.8984	13.5091
17.4711	14
16.5804	12.8397
16.2755	13.5669
15.8988	12.7729
15.7427	12.5435
15.011	11.805
7.67518	9.50407
14.442	14.2865
17.7156	13.5117
15.0358	14.0816
9.7301	21.3381
22.2896	13.9586
17.046	10.1303
20.4847	11.1225
16.1104	9.29412
15.0918

## Sheet: C
WT	Homo
15.0907	10.2421
17.3013	15.2318
13.8039	14.7069
18.6867	10.1076
16.8958	12.4695
14.3761	12.9444
15.2378	11.6689
14.9592	19.1843
6.8776	24.7085
15.7254	15.925
13.0908	10.5573
11.7469	13.032
13.4715	9.57143
14.098	11.0821
12.3561	13.9273
6.66753	13.3043
16.1648	17.7385
14.7591	15.2696
5.02188	12.0028
3.94466	14.84
12.849	16.9699
13.5336

## Sheet: D
frequency			amplitude
WT	Homo		WT	Homo
0.033333	0.561667		16.357	11.709
1.0027	0.191667		10.197	7.669
0.14	0.143333		5.958	9.311
1.21333	0.051667		12.995	7.659
0.366667	0.221667		10.559	8.274
0.881967	0.102632		10.7	7.246
0.448333	0.311667		11.209	8.153
0.61875	0.08		11.65	8.151
0.643333	0.193333		9.851	9.029
0.828333	0.635417		10.489	10.46

## Sheet: G
Elimination				Formation
WT	Hetero	Homo		WT	Hetero	Homo
9.8	14.1	11.9		11.6	13.5	11.31
9	16	18.54		11.4	9.8	15.17
10.95	18.2	18		10.22	8.8	14
10.7	9.4	17		11.9	8.5	9
9.5	15.8	15		9.5	10.2	11
10.6	14.8	13		9.9	8.5	6

## Sheet: H
Elimination				Formation
WT	Hetero	Homo		WT	Hetero	Homo
14.9	14.8	7.78		9.5	14.8	24.55
11.7	14	22.09		8.2	15.7	17.44
14.71	9	18		13.24	17.9	24
11.8	17.1	11		9.9	20	22
14.2	20.4	18		8.9	12.6	15
12.7	12.7	14		10	10.9	19

## Sheet: I
Day 0- 2				Day 2- 7
WT	Hetero	Homo		WT	Hetero	Homo
21.4	27.6	23.21		24.4	29.6	32.34
20.4	25.9	33.71		19.9	29.9	39.53
21.17	27	31.25		27.94	26.9	41.42
22.6	17.9	26.67		21.7	37.1	33.13
19	26	26.3		23.1	33	32.7
20.5	23.3	18.7		22.7	23.6	32.7

## Sheet: J
WT	Hetero	Homo
31	55	65
20	57	48
47	30	55
29	70	42
31	36	41
19	42	60
