# Supplementary material for: Specific depletion of the motor protein KIF5B leads to deficits in dendritic transport, synaptic plasticity and memory
Source: eLife journal article supplement (doi:10.7554/elife.53456), 2020-01-21
Supplement: supp [file elife-53456-supp-v1.zip › elife_poa_e53456_Figure_8_figure_supplement_1_source_data_1.xlsx]

## Sheet: A
Centre time				Total distance
WT	Hetero	Homo		WT	Hetero	Homo
11	15	20		35.762	32.197	34.404
8	9	20		40.192	12.114	26.249
9	27	10		29.078	24.024	26.114
12	4	12		26.505	21.857	30.323
6	10	19		25.593	22.479	34.456
23	7	6		15.837	39.766	15.431
25	2	19		31.957	15.99	30.617
9	7	17		28.108	8.295	17.303
11	14	9		4.494	22.194	29.899
9	7	17		24.332	31.654	32.213
11	6	26		26.874	25.376	24.495
	13	11			24.946	24.427

## Sheet: B
WT	Hetero	Homo
19	11	31
16	39	25
16	24	7
8	0	14
60	10	17
17	20	11
12	4	0
15	0	23
86	0	29
5	21	22
12	20	42
	10	9

## Sheet: C
WT	Hetero	Homo
26	19	29
40	74	31
56	38	13
40	37	25
1	14	19
25		26
14		9
		41
		11

## Sheet: D
Day	WT
1	26.4	40.9	32.8	33.6	31.2
2	29.8	45.2	43.4	40.9	36.1
3	39.4	58.2	47.7	43.1	46.2
4	41.3	57.5	52.3	47.7	58
5	44.9	56.9	48.1	42.8	47.1
6	50	56.9	54.1	58.2	53.5
7	40.6	59.1	49.3	64.8	53
Day	Hetero
1	30.4	36.5
2	34.1	39.6
3	47	44.7
4	61.1	48.5
5	55	53
6	53.1	52.9
7	51.5	46.5
Day	Homo
1	30.7	35.4	26.9	31.9	30	29.8	29.9
2	34.1	50.5	36.2	42	33.4	33.8	35.8
3	28.6	52	43.3	46.5	41.4	42.8	42
4	27.8	52.3	47.2	45.7	50	48.5	46.7
5	39.8	61.6	45.2	43.6	45.7	45.7	46
6	48.1	60.2	53.6	44.9	51.7	51	49.7
7	46.2	50.5	45.1	60	47.2	48.4	48
