# Supplementary material for: Specific depletion of the motor protein KIF5B leads to deficits in dendritic transport, synaptic plasticity and memory
Source: eLife journal article supplement (doi:10.7554/elife.53456), 2020-01-21
Supplement: supp [file elife-53456-supp-v1.zip › elife_poa_e53456_Figure_8_figure_supplement_2_source_data_1.xlsx]

## Sheet: A
Total interaction time				Inanimate			Mouse 1				Socialbility Index
WT	Hetero	Homo		WT	Hetero	Homo	WT	Hetero	Homo		WT	Hetero	Homo
273.5	236.5	236.8		106.2	49.2	33.9	167.3	187.3	202.9		22	58	71
167.9	200.6	181.8		55.7	50.4	60.1	112.2	150.2	121.7		34	50	34
243.4	254.8	200.1		77.9	50.1	21.5	165.5	204.7	178.6		36	61	79
266.5	165.7	208		87.6	61.4	29.4	178.9	104.3	178.6		34	26	72
193.2	184	178.1		130.8	74.7	39.3	62.4	109.3	138.8		-35	19	56
190	157.9	225.6		84.4	57.4	41.8	105.6	100.5	183.8		11	27	63
138.4	196.5	155.7		65.3	55.9	62.1	73.1	140.6	93.6		6	43	20
155.4	215.6	232.9		37.2	35.5	74.9	118.2	180.1	158		52	67	36
198.3	220.3	124.8		84.9	77.8	29.4	113.4	142.5	95.4		14	29	53
114.9	238.9	266.6		43.3	72.9	66.8	71.6	166	199.8		25	39	50
	263	238.1			99.4	67.3		163.6	170.8			24	43

## Sheet: B
Total interaction time				Mouse1			Mouse2
WT	Hetero	Homo		WT	Hetero	Homo	WT	Hetero	Homo
305.5	244.4	237		87.9	76.4	98.8	217.6	168	138.2
214.8	247.3	256.8		47.4	69.6	51	167.4	177.7	205.8
195.7	289.1	129.4		81.4	50.5	49.4	114.3	238.6	80
290.1	194.9	211.4		133.2	103.1	96.4	156.9	91.8	115
185.3	160.3	221.1		37.6	85.3	85.4	147.7	75	135.7
242.7	220.5	238.9		90.5	92.6	136.4	152.2	127.9	102.5
192.3	231.6	240.2		75.7	101.2	91.8	116.6	130.4	148.4
183.2	297.8	155.7		39.2	54.7	95	144	243.1	60.7
184.2	314.6	258.2		64.2	83.1	171	120	231.5	87.2
168.7	282.8	249.2		57.9	81.3	115.7	110.8	201.5	133.5
	162	227.6			54.9	117.4		107.1	110.2

## Sheet: C
	WT												Hetero														Homo
0-25s	0	0	2.13	0	0	0	1.06	0	8.51	0		0-25s	1.06	0	1.06	0	1.06	0	7.45	1.06	0	1.06	0	2.13		0-25s	1.06	9.57	0	6.38	10.64	2.13	0	0	1.06	4.26	0	0
50s	2.13	1.06	2.13	0	0	2.13	2.13	0	9.57	0		50s	2.13	0	5.32	21.28	24.47	8.51	0	1.06	0	4.26	1.06	2.13		50s	3.19	15.96	0	9.57	14.89	2.13	22.34	5.32	7.45	9.57	0	6.38
50-75s	0	4.26	0	4.26	0	3.19	2.13	0	13.83	1.06		50-75s	4.26	0	5.32	0	1.06	7.45	9.57	8.51	3.19	2.13	0	0		50-75s	2.13	14.89	0	1.06	0	1.06	21.28	6.38	2.13	0	6.38	1.06
75-100s	0	0	0	1.06	0	18.09	15.96	9.57	34.04	4.26		75-100s	2.13	8.51	8.51	0	27.66	21.28	8.51	13.83	9.57	7.45	1.06	13.83		75-100s	3.19	14.89	0	2.13	6.38	21.28	25.53	11.7	2.13	13.83	8.51	14.89
100-125s	10.64	17.02	18.09	10.64	0	34.04	8.51	8.51	61.7	7.45		100-125s	15.96	24.47	15.96	10.64	67.02	38.3	19.15	26.6	11.7	10.64	5.32	11.7		100-125s	13.83	11.7	3.19	10.64	14.89	20.21	48.94	22.34	9.57	60.64	20.21	30.85
150s	24.47	13.83	15.96	4.26	4.26	9.57	15.96	4.26	57.45	20.21		150s	13.83	22.34	11.7	11.7	64.89	30.85	14.89	35.11	27.66	24.47	13.83	15.96		150s	17.02	15.96	2.13	8.51	6.38	21.28	31.91	19.15	12.77	53.19	15.96	23.4
150-175s	13.83	21.28	27.66	5.32	9.57	40.43	28.72	41.49	58.51	35.11		150-175s	46.81	7.45	29.79	43.62	12.77	40.43	14.89	26.6	42.55	24.47	31.91	26.6		150-175s	7.45	31.91	2.13	8.51	5.32	18.09	24.47	39.36	34.04	57.45	42.55	54.26
175-200s	14.89	40.43	29.79	27.66	18.09	31.91	43.62	36.17	44.68	15.96		175-200s	30.85	27.66	10.64	37.23	50	44.68	17.02	34.04	34.04	15.96	42.55	37.23		175-200s	22.34	36.17	3.19	13.83	14.89	34.04	26.6	31.91	44.68	48.94	24.47	46.81
200-225s	54.26	58.51	52.13	48.94	52.13	62.77	56.38	44.68	94.68	26.6		200-225s	44.68	40.43	46.81	37.23	79.79	60.64	22.34	52.13	63.83	51.06	75.53	63.83		200-225s	20.21	41.49	8.51	11.7	37.23	57.45	47.87	26.6	36.17	37.23	77.66	46.81
250s	67.74	52.69	66.67	52.69	54.84	93.55	65.59	67.74	67.74	27.96		250s	72.04	63.44	49.46	29.03	70.97	45.16	48.39	81.72	78.49	77.42	63.44	61.29		250s	5.38	65.59	31.18	7.53	39.78	79.57	82.8	38.71	59.14	62.37	87.1	69.89

## Sheet: D
Primary error during acquisation
Trial	WT												Trial	Homo
1	15	21	8	12	32	16	18	22	17	3	33		1	28	8	29	17	8	1	6	8	10	1	8	6	14
2	2	16	15	12	10	9	6	11	12	18	20		2	21	11	6	9	5	13	13	4	2	8	5	6	8
3	13	17	8	26	11	13	5	17	14	2	28		3	3	11	18	3	3	1	6	12	5	15	8	19	11
4	9	15	7	4	13	7	3	18	13	26	4		4	9	10	5	1	9	12	13	14	6	10	9	1	2
5	9	5	7	9	13	15	2	13	12	3	9		5	10	15	2	8	3	3	8	1	4	7	20	1	22
Primary error on Day 5
WT	Homo
14	8
13	19
17	2
2	3
5	8
18	38
11	5
0	7
3	14
1	6
8	8
	14
	21
	2
