# Supplementary material for: Specific depletion of the motor protein KIF5B leads to deficits in dendritic transport, synaptic plasticity and memory
Source: eLife journal article supplement (doi:10.7554/elife.53456), 2020-01-21
Supplement: supp [file elife-53456-supp-v1.zip › elife_poa_e53456_Figure_8_source_data_1.xlsx]

## Sheet: A
WT	Hetero	Homo
42	37	17
56	44	60
17	65	24
8	-6	9
59	-6	23
25	16	-14
21	13	24
57	63	-22
30	47	-32
31	43	7
	32	-3

## Sheet: B
WT	Hetero	Homo
76	77	51.3
56.2	33.1	47.4
58.2	33.2	50
58.9	53.1	54.2
70	66.9	63.6
70.6	36	11.7
46	72.5	21.1
61.7	40.6	44.3
54.4	45.5	48.8
72.3	26.6	39.1
58.8	32.4	13.4
	60.5	72.3

## Sheet: C
Pre-CS				CS
WT	Hetero	Homo		WT	Hetero	Homo
27	53	18		72	76	22
34	49	23		64	85	28
40	35	24		68	91	32
41	33	29		76	53	50
56	22	23		92	49	36
44	49	55		53	64	74
46	57	11		58	62	31
15	44	7		50	56	31
39	39	27		74	60	33
9.8	22	13		46.9	41	20
22	22	48		67.1	57	86
31.9				78.7

## Sheet: D
WT	Homo
11	178
12	104
25	5
8	75
10	25
30	148
4	18
4	19
5	125
5	23
13	9
	22
	121
	5

## Sheet: E
fEPSP						fEPSP amplitude
Time (min)	WT		kif5b-/-			WT	kif5b-/-
	mean	SEM	mean	SEM		126.31	123.26
1	1.02404	0.00818646	1.04592	0.00913076		144.478	110.684
2	1.01566	0.00916861	1.02483	0.0121262		154.22	96.1523
3	1.01118	0.00615471	1.03218	0.00545369		118.115	113.269
4	1.01033	0.00534036	1.00379	0.00673777		126.115	118.555
5	0.980184	0.0237168	1.00697	0.00760866		144.059	98.3564
6	1.00225	0.00918569	1.02522	0.0100108		123.862	128.697
7	0.99734	0.00470464	1.00147	0.0157188		165.447	102.776
8	0.994398	0.00427634	0.983309	0.0075284		102.769	105.368
9	0.99973	0.0055584	0.984178	0.00847764		131.139	126.98
10	1.00298	0.00617841	1.00405	0.0092162		118.221	128.139
11	0.998879	0.00531216	0.989875	0.0101912		110.447	103.048
12	0.990062	0.00485426	0.976809	0.0121982		150.267	129.547
13	0.994541	0.00514985	0.982857	0.00750745		149.625	120.254
14	0.988439	0.00589364	0.969735	0.0174614		138.176	133.27
15	0.989982	0.00740515	0.968797	0.00843443		128.018	87.8121
16	2.09932	0.068999	1.93033	0.061785		142.047	120.999
17	2.05913	0.071962	1.91061	0.0625744		126.31	105.454
18	1.89774	0.0661164	1.75694	0.0528091		142.266
19	1.72379	0.0544959	1.63402	0.0376063		126.172
20	1.62625	0.0446876	1.5242	0.0316609		139.951
21	1.57585	0.0396237	1.47785	0.0279423		122.514
22	1.54864	0.0384034	1.4159	0.0254458
23	1.49432	0.035958	1.3716	0.0302954
24	1.47297	0.0378305	1.35435	0.0257651
25	1.45305	0.0327631	1.34877	0.0248707
26	1.45987	0.0319835	1.33108	0.0230668
27	1.42727	0.0323807	1.30042	0.0281482
28	1.43078	0.0350159	1.29463	0.032375
29	1.4159	0.0352665	1.3116	0.022079
30	1.41294	0.0314366	1.28954	0.0286445
31	1.40022	0.0312974	1.2966	0.0197568
32	1.40092	0.0337997	1.27177	0.0246706
33	1.35077	0.0536633	1.2864	0.0261018
34	1.387	0.0347225	1.25894	0.0247458
35	1.38153	0.0308472	1.25832	0.0226549
36	1.38277	0.0328965	1.2568	0.0224192
37	1.37268	0.0316539	1.23412	0.0287392
38	1.36987	0.0301754	1.25144	0.0227273
39	1.3475	0.028255	1.22581	0.0271428
40	1.34745	0.0315631	1.24448	0.0229177
41	1.37971	0.0318581	1.22001	0.0271105
42	1.36182	0.0276381	1.22145	0.0268273
43	1.36271	0.0294503	1.19784	0.0291342
44	1.35809	0.0294541	1.20601	0.0252563
45	1.34473	0.0268949	1.21009	0.0253512
46	1.36245	0.0263655	1.22919	0.0303496
47	1.36287	0.0295826	1.20826	0.024432
48	1.35698	0.0272856	1.19773	0.0279163
49	1.35433	0.028199	1.18502	0.0288436
50	1.3531	0.0284176	1.19842	0.0288914
51	1.35998	0.0324137	1.19175	0.02802
52	1.33896	0.0299988	1.19597	0.0277362
53	1.37142	0.0343566	1.17056	0.0292639
54	1.34197	0.0295866	1.17173	0.0292168
55	1.3469	0.0310675	1.1706	0.0313641
56	1.34127	0.0290723	1.16054	0.0287699
57	1.34668	0.0310854	1.15735	0.0268841
58	1.34462	0.0322247	1.16241	0.0258494
59	1.34896	0.0292663	1.17606	0.0317956
60	1.35242	0.0300421	1.15878	0.0302992
61	1.3315	0.0315911	1.16658	0.0261024
62	1.33738	0.0296759	1.14759	0.0324904
63	1.31731	0.0313577	1.14655	0.0255442
64	1.32966	0.0325943	1.15761	0.0286563
65	1.34394	0.0301778	1.14424	0.0311714
66	1.33748	0.0305686	1.14395	0.0306652
67	1.3357	0.034015	1.14339	0.0286311
68	1.33975	0.0356733	1.13876	0.0319099
69	1.33232	0.0304544	1.14907	0.0320601
70	1.29742	0.0413032	1.12278	0.03244
71	1.33001	0.0360345	1.15024	0.0362201
72	1.31709	0.0329215	1.15051	0.0323118
73	1.339	0.0333189	1.13851	0.0350187
74	1.32783	0.033799	1.13388	0.0344928
75	1.33278	0.0348923	1.14934	0.0350463

## Sheet: F
	Amplitude (uV)		SEM
Stimulation (uA)	WT	Homo	WT-sem	Homo-sem
0	15.8545	22.381	1.28363	6.95872
10	34.0636	31.93	3.43713	2.43051
20	329.382	258.081	58.3279	57.699
30	564.618	503.475	97.074	90.259
40	768.709	698.357	111.951	106.502
50	903.091	812.282	118.731	120.117
60	883.188	674.357	135.904	76.4341
70	975.662	838.815	136.254	70.1379
80	906.15	886.8	119.698	70.5219
90	980.22	944.34	141.364	64.2439
100	1040.35	1004.41	176.79	66.1273

## Sheet: G
	Pair-pulse Ratio		SEM
Inter-pulse Duration (ms)	WT	Homo	WT-sem	Homo-sem
50	1.51031	1.64629	0.0689216	0.0592551
100	1.54187	1.65493	0.0534784	0.0542664
150	1.42717	1.5858	0.0481621	0.0498148
200	1.36616	1.49256	0.042313	0.0405158
400	1.16068	1.22175	0.033552	0.0293733
