# Supplementary figures and images for: Specific depletion of the motor protein KIF5B leads to deficits in dendritic transport, synaptic plasticity and memory
Source: eLife journal article supplement (doi:10.7554/elife.53456), 2020-01-21

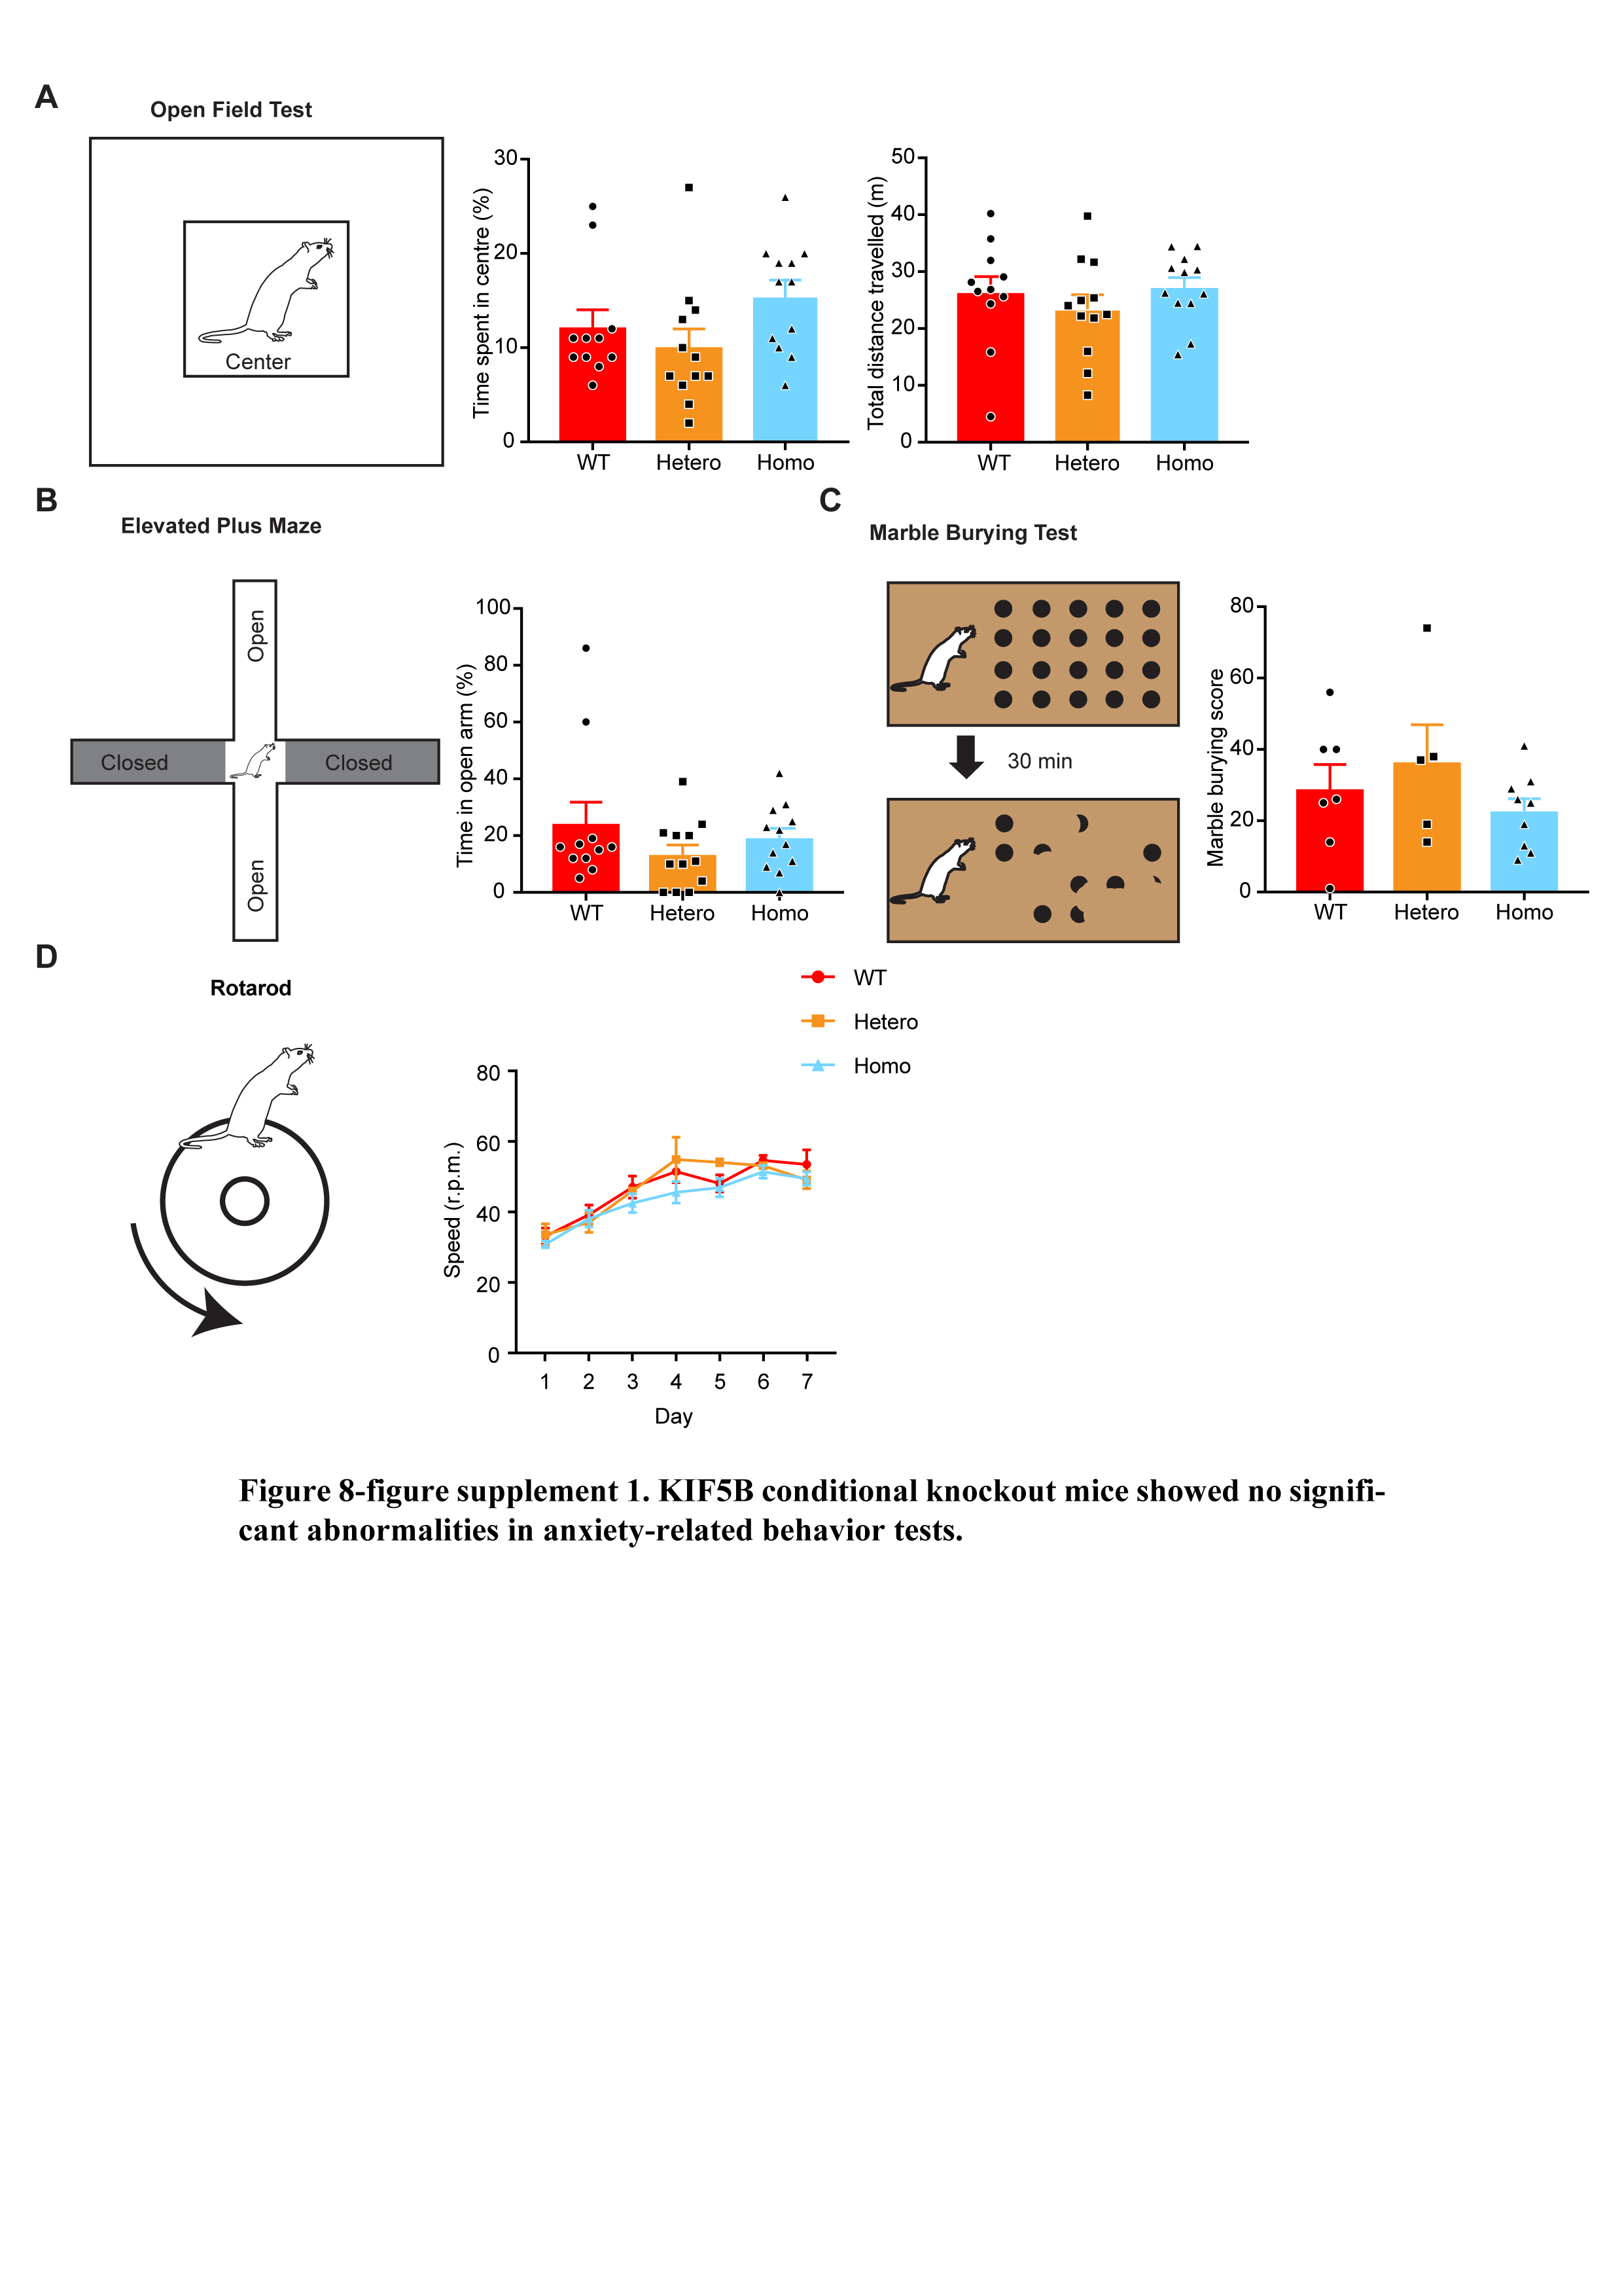

Supplement: supp [file elife-53456-supp-v1.zip › elife_poa_e53456_Figure_8_figure_supplement_1.jpg]

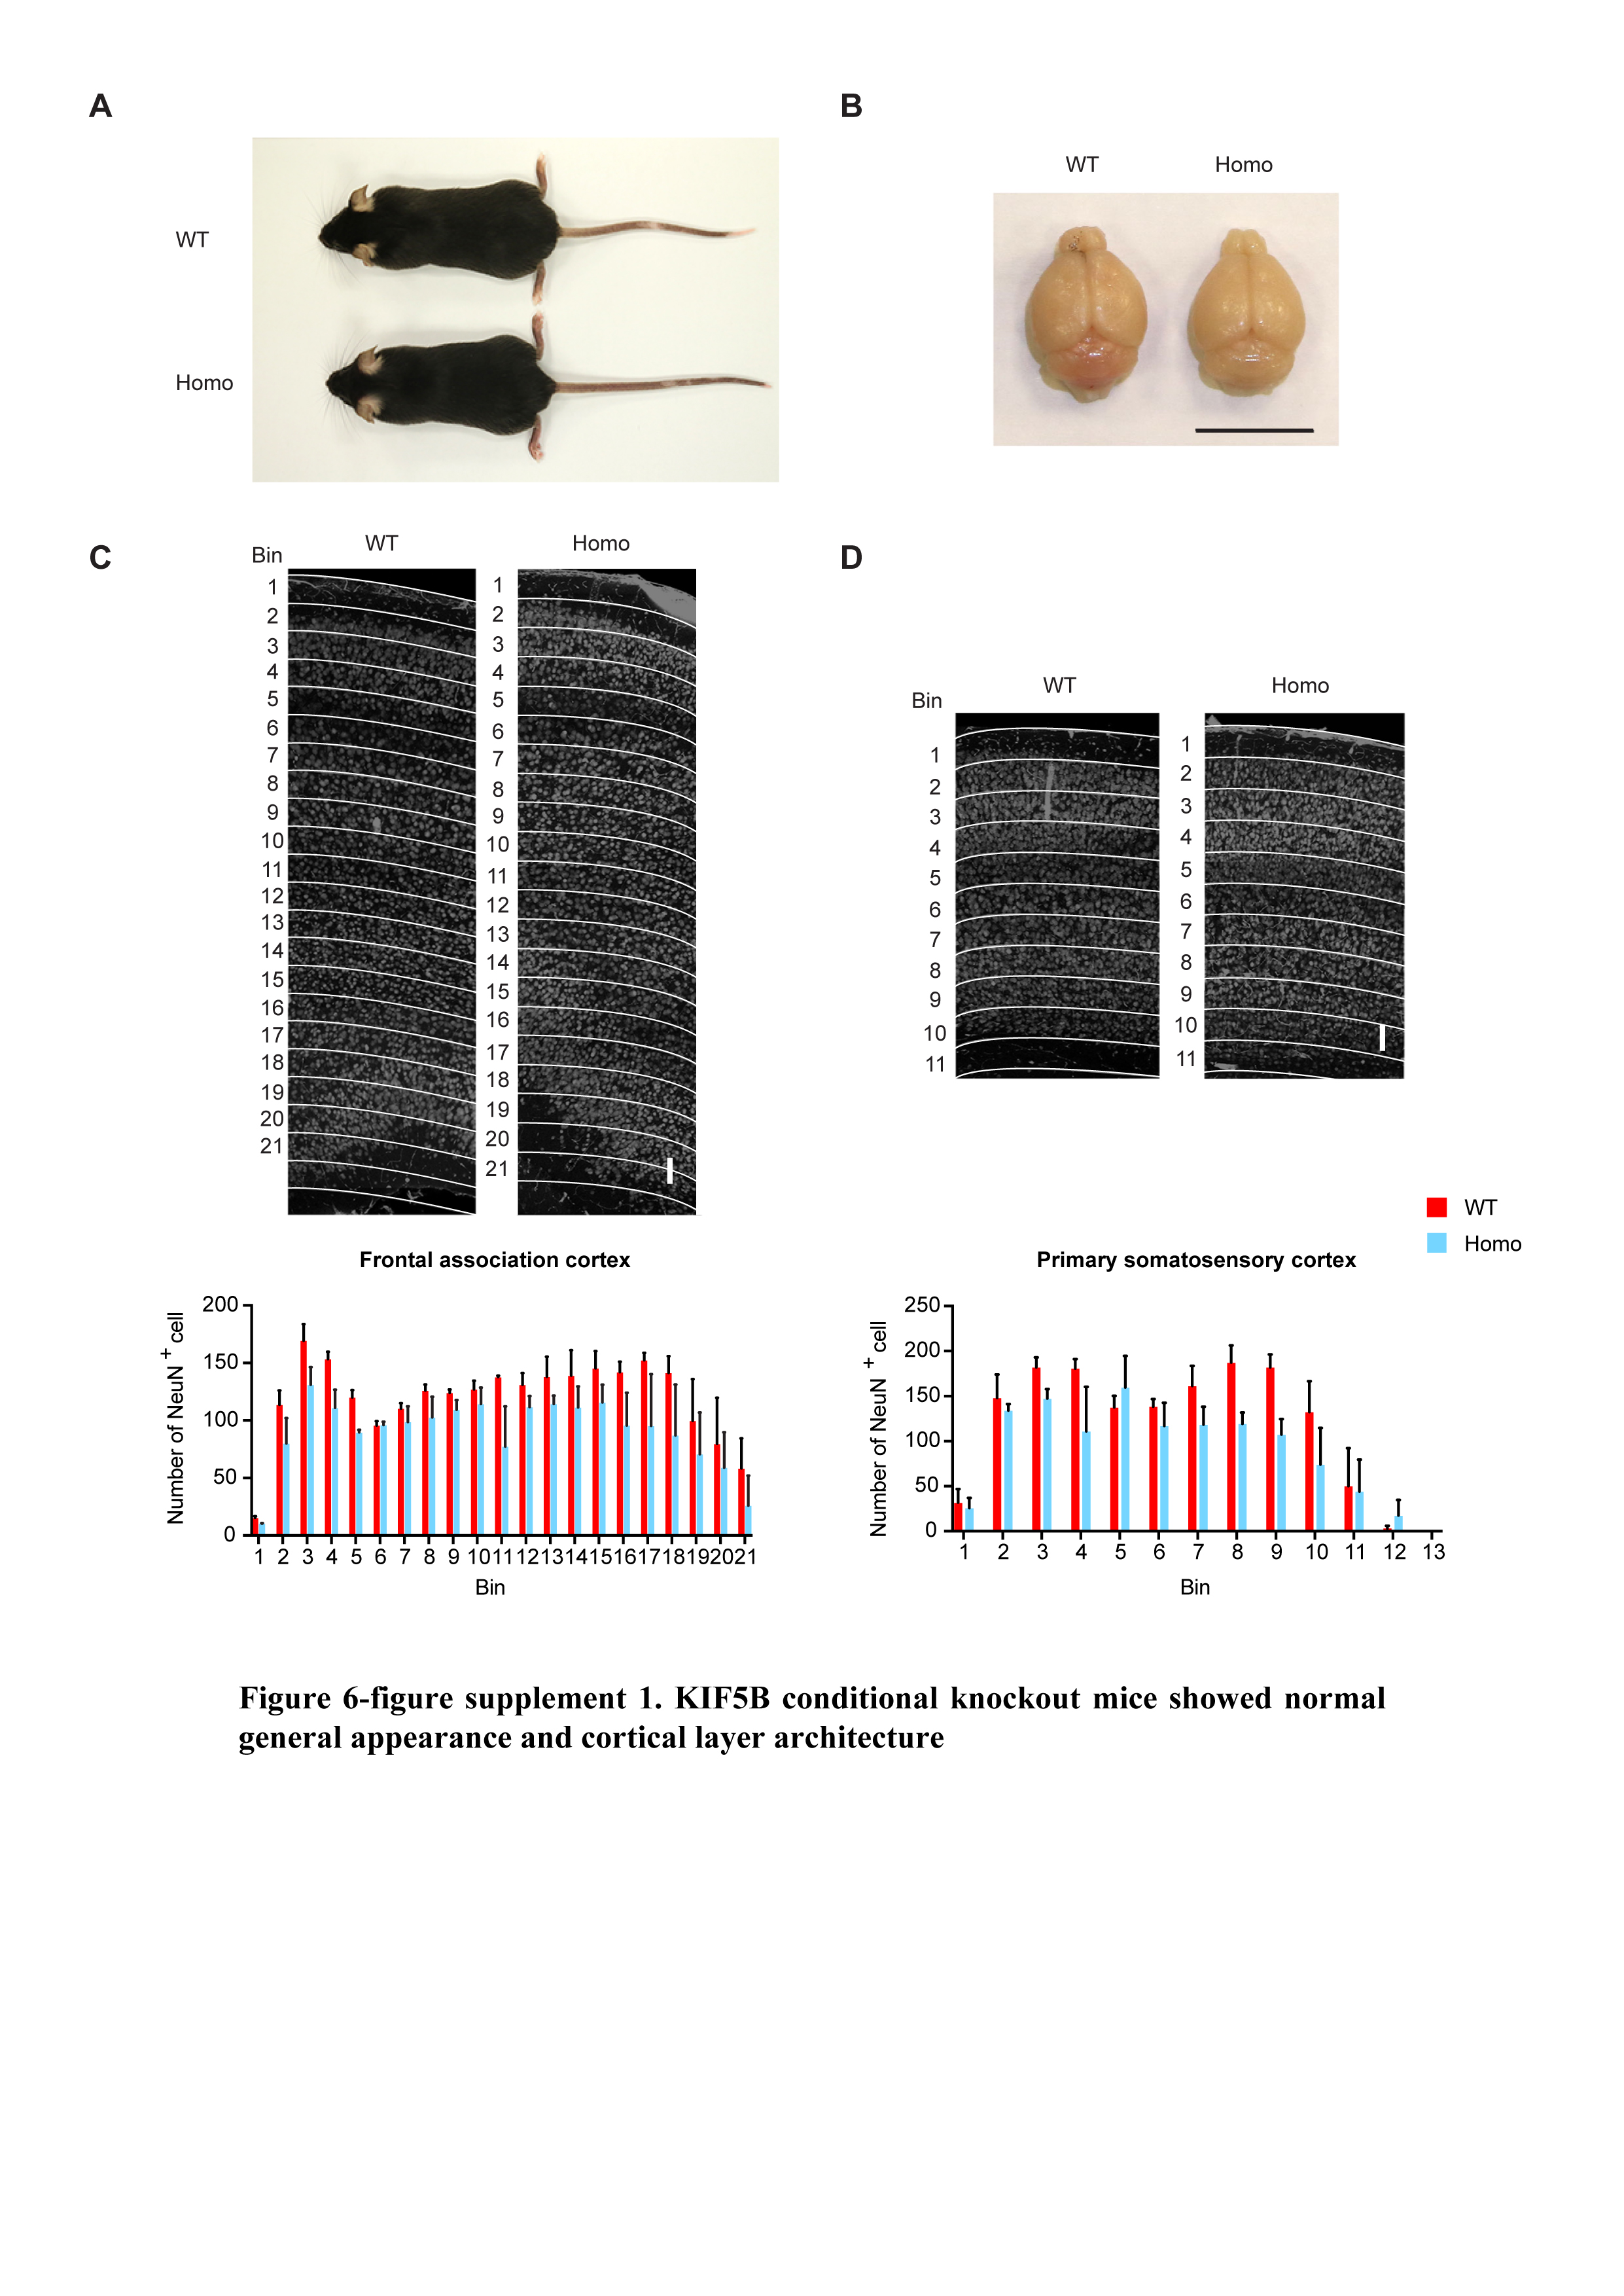

Supplement: supp [file elife-53456-supp-v1.zip › elife_poa_e53456_Figure_6_figure_supplement_1.jpg]

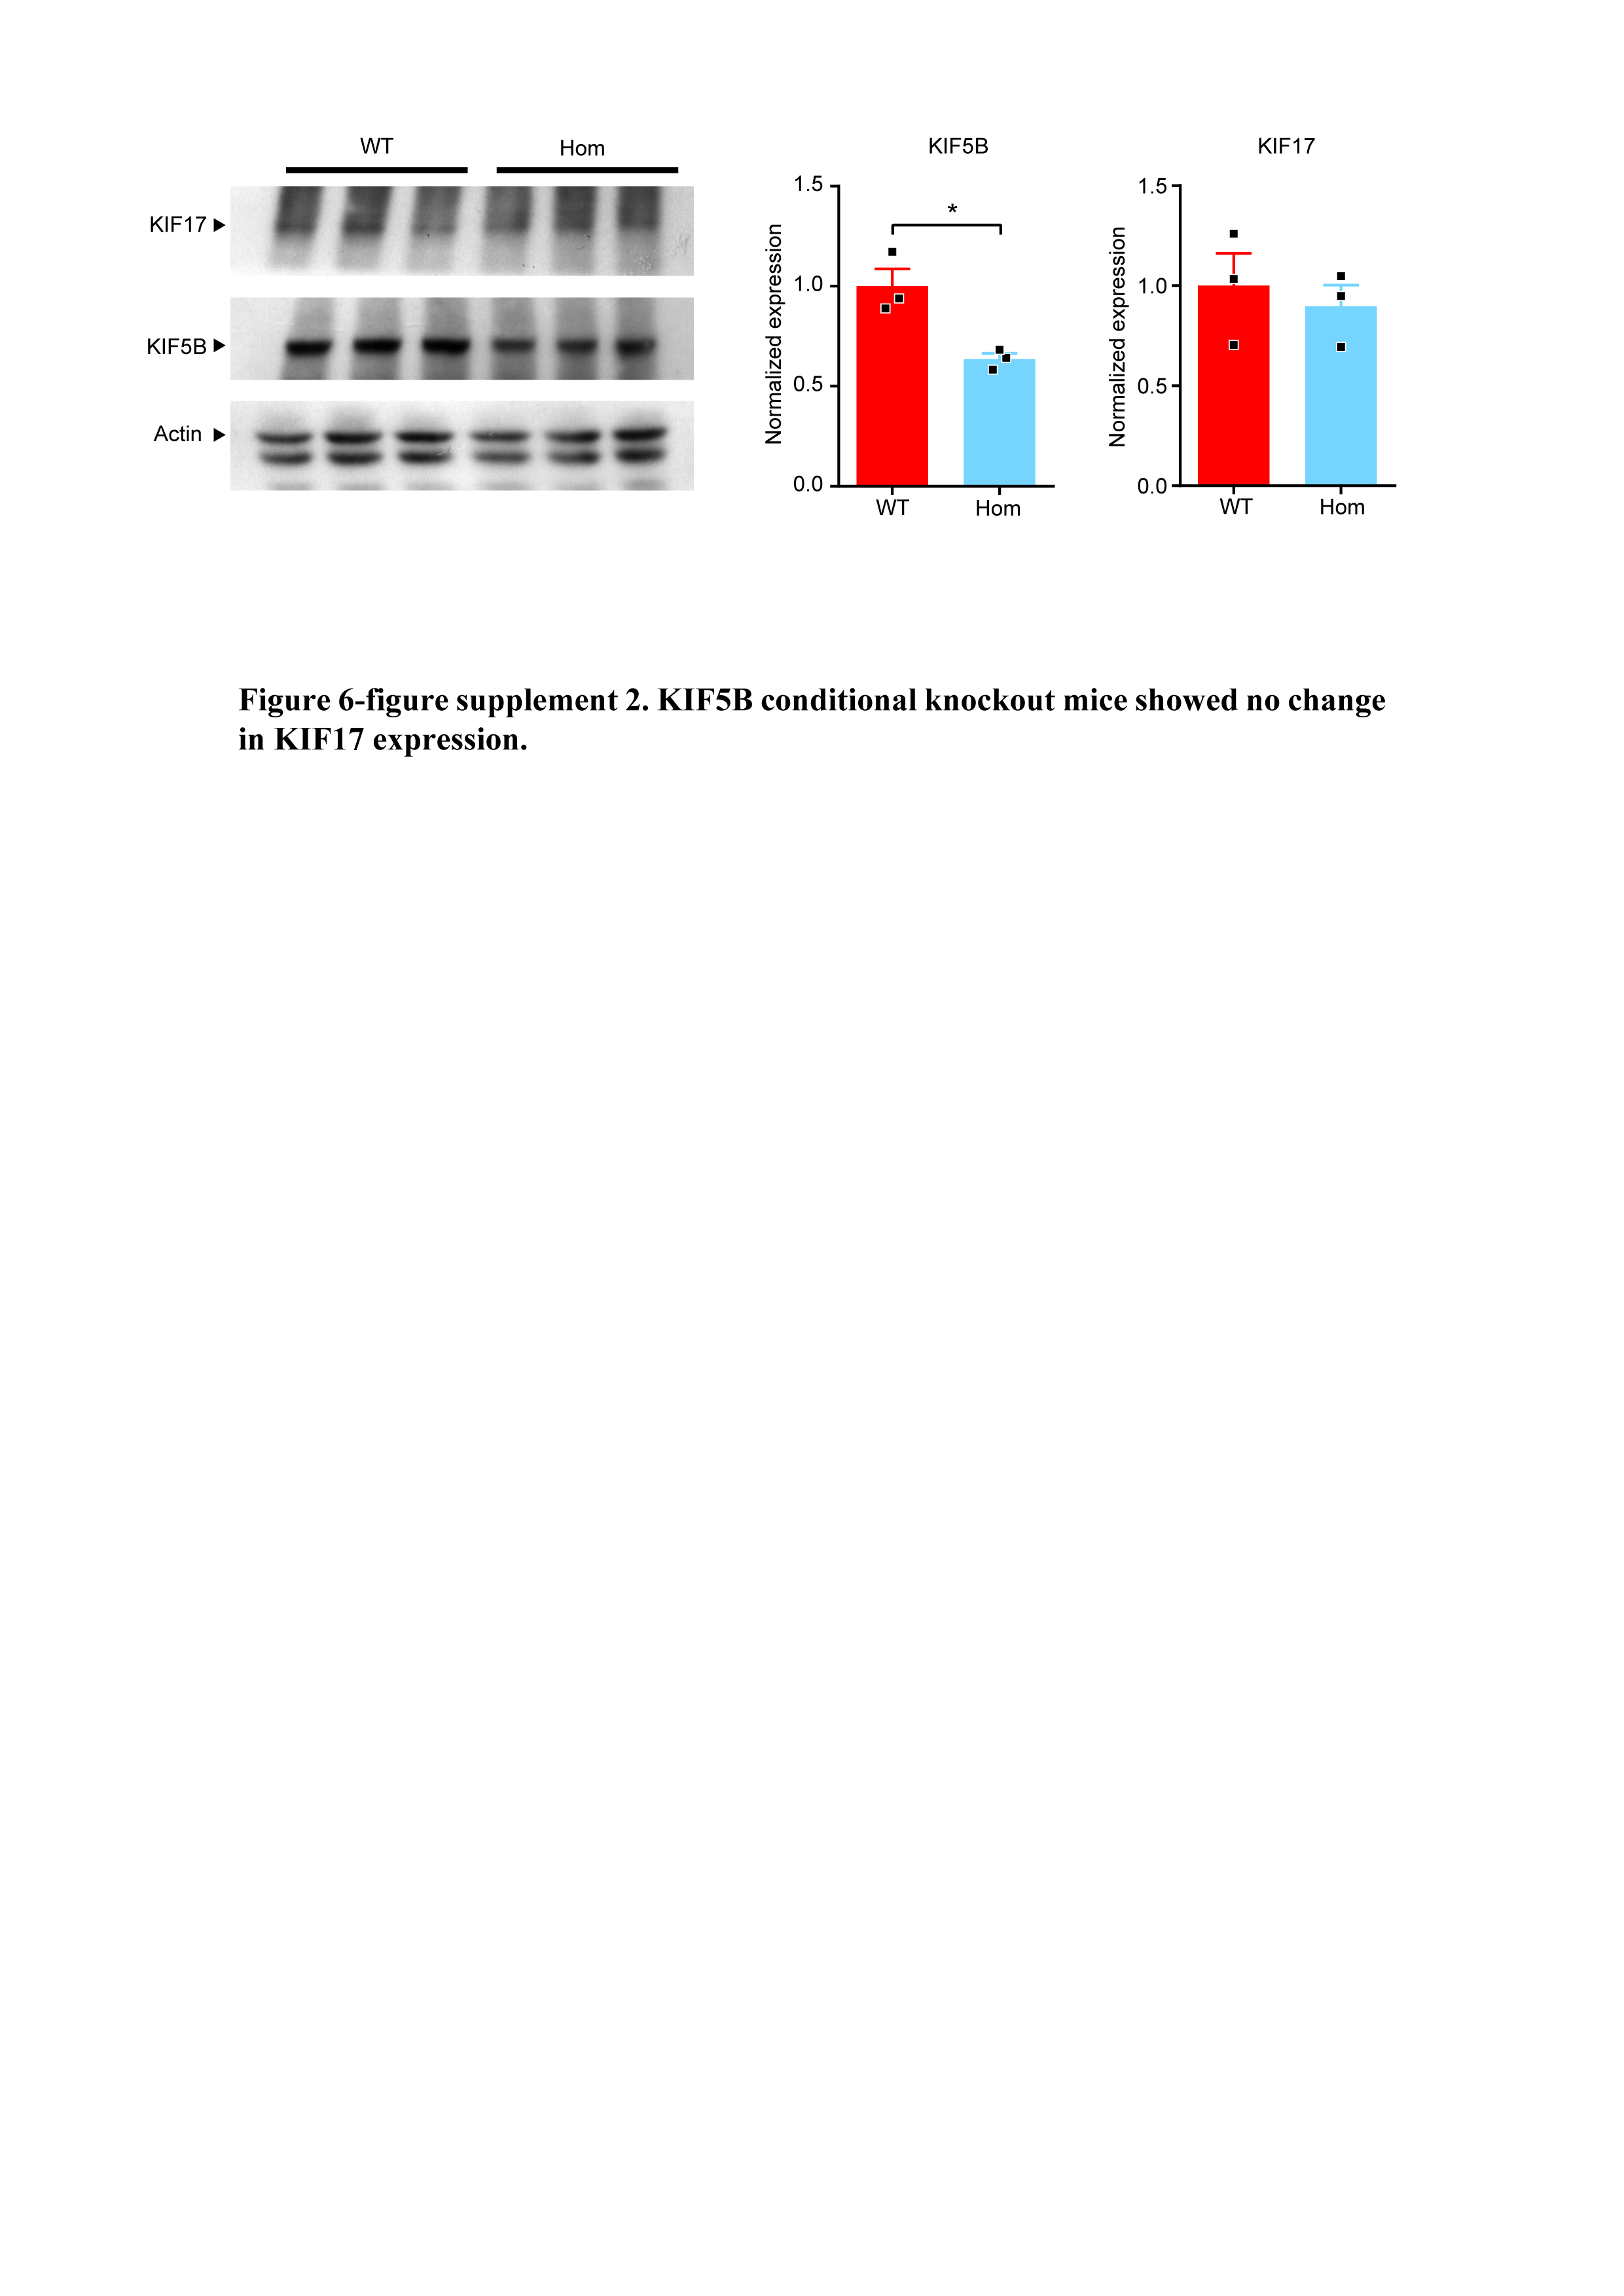

Supplement: supp [file elife-53456-supp-v1.zip › elife_poa_e53456_Figure_6_figure_supplement_2.jpg]

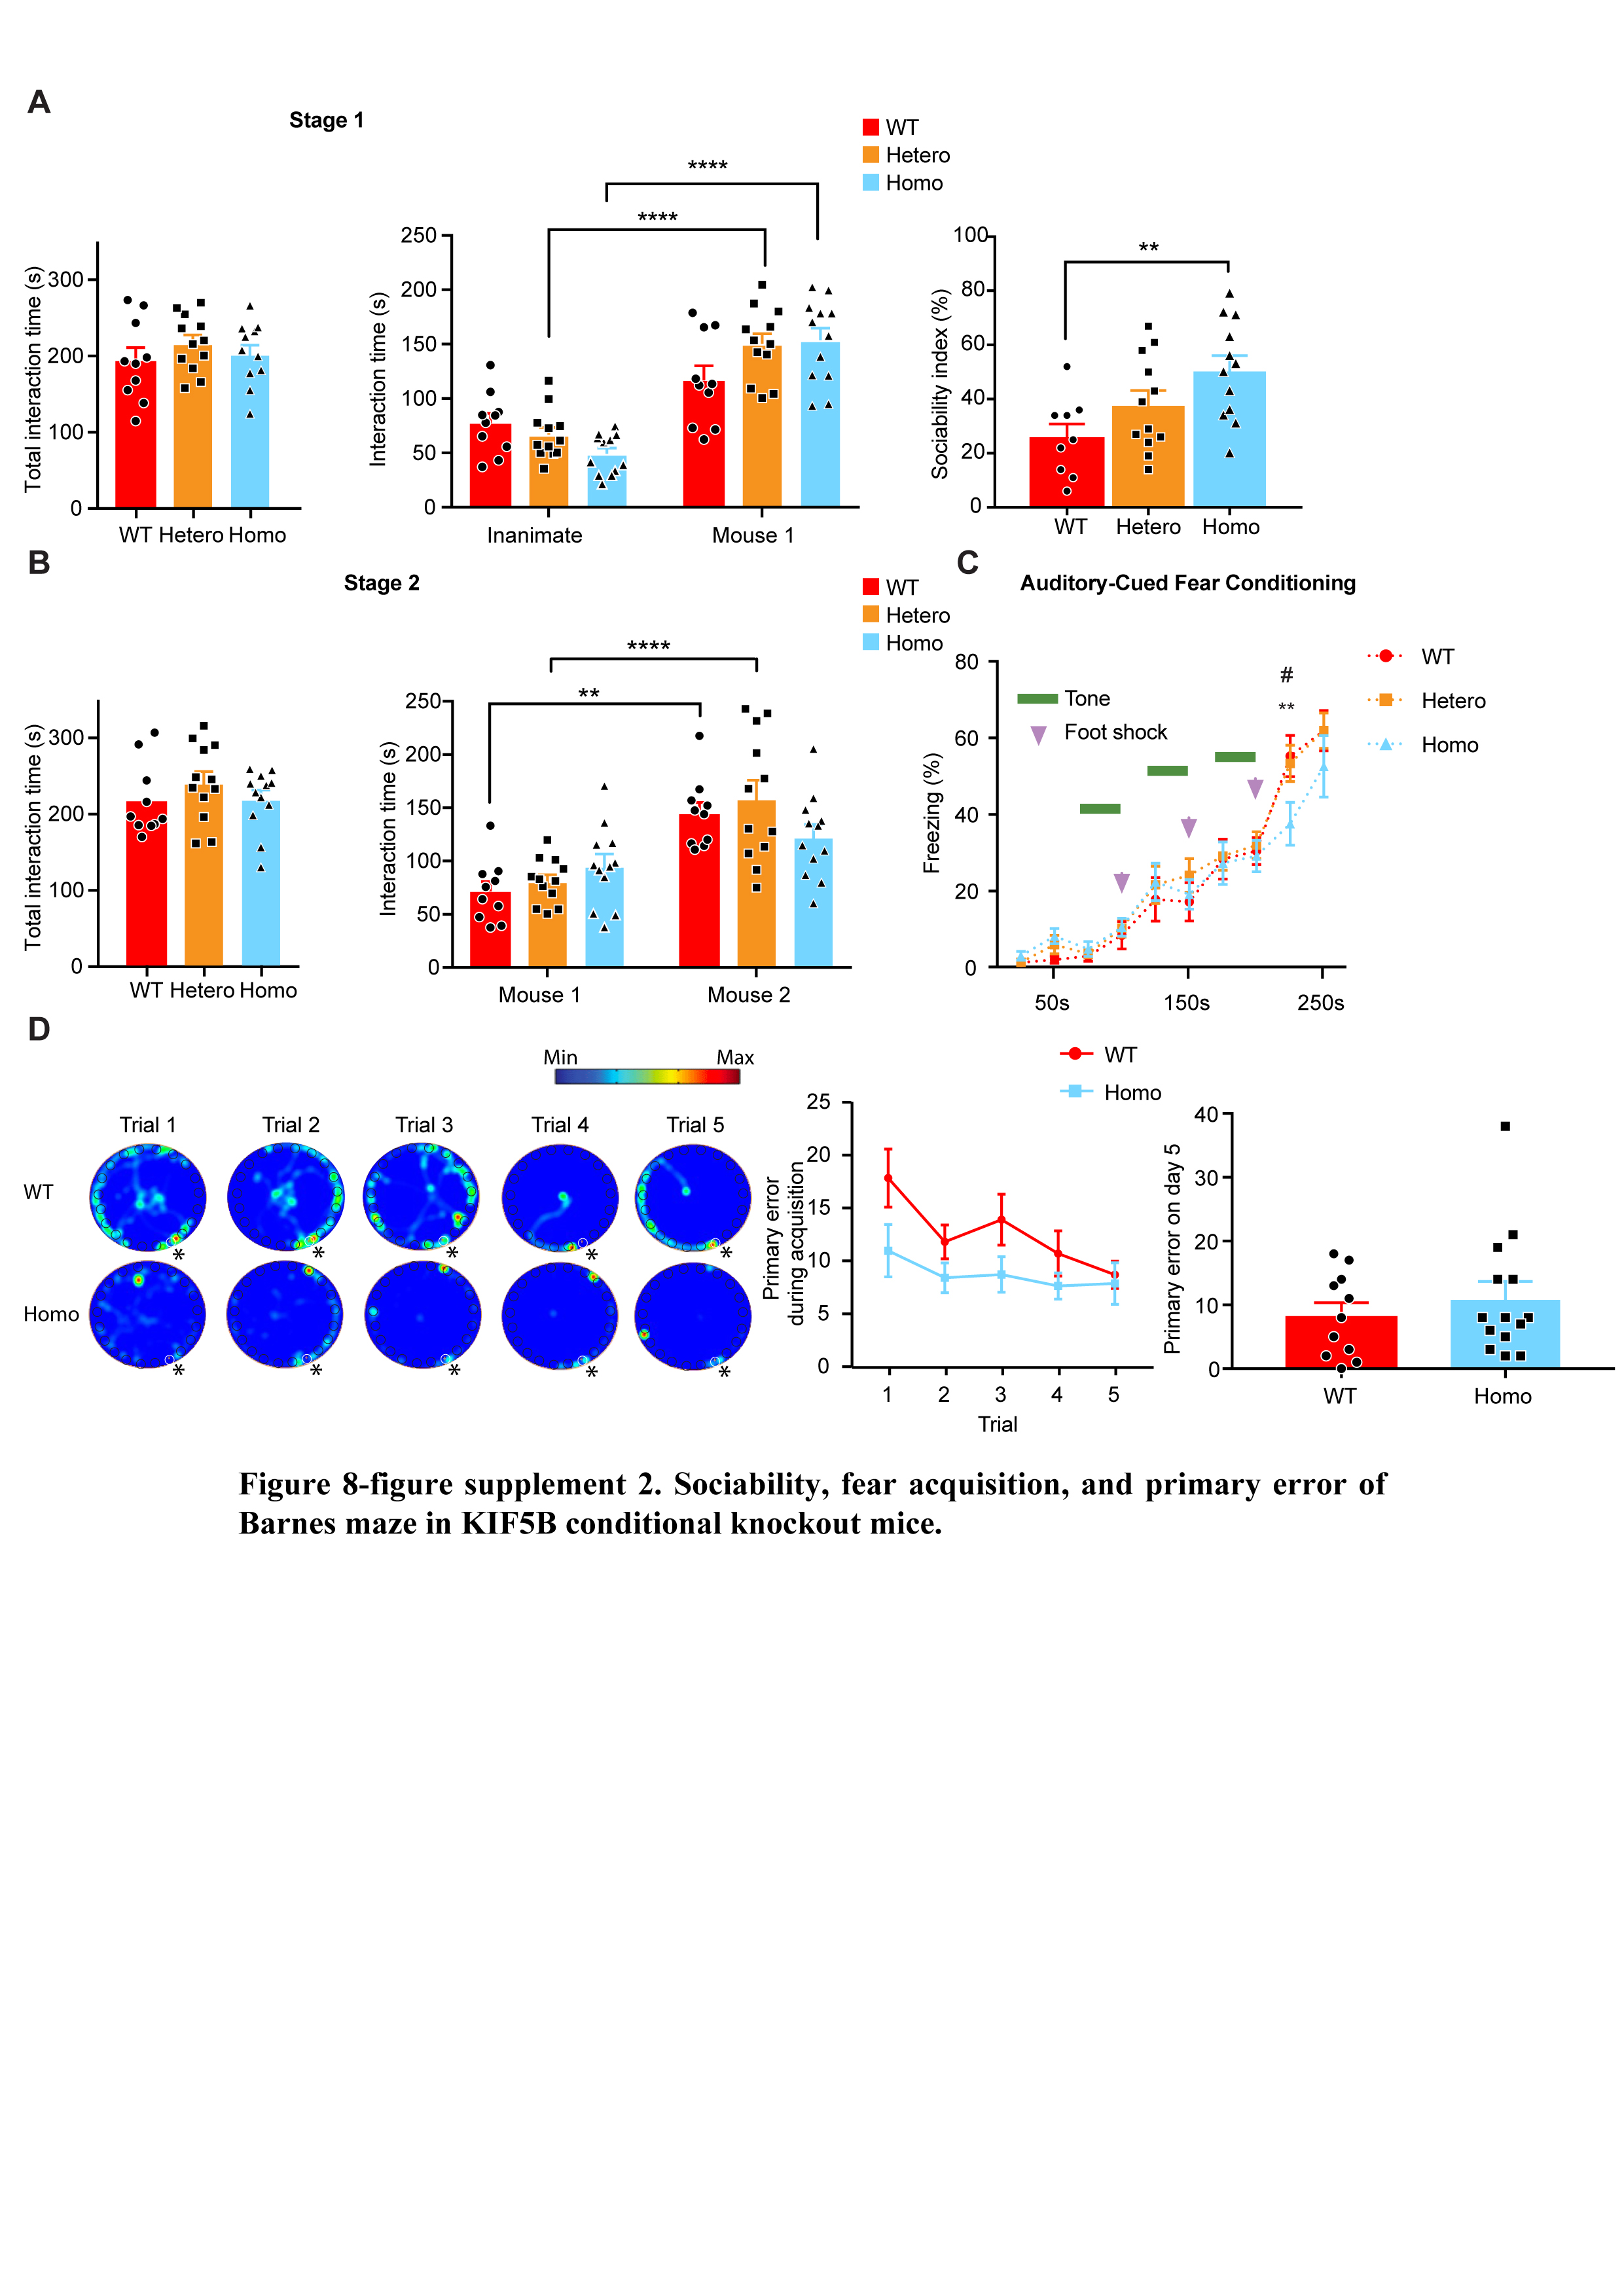

Supplement: supp [file elife-53456-supp-v1.zip › elife_poa_e53456_Figure_8_figure_supplement_2.jpg]

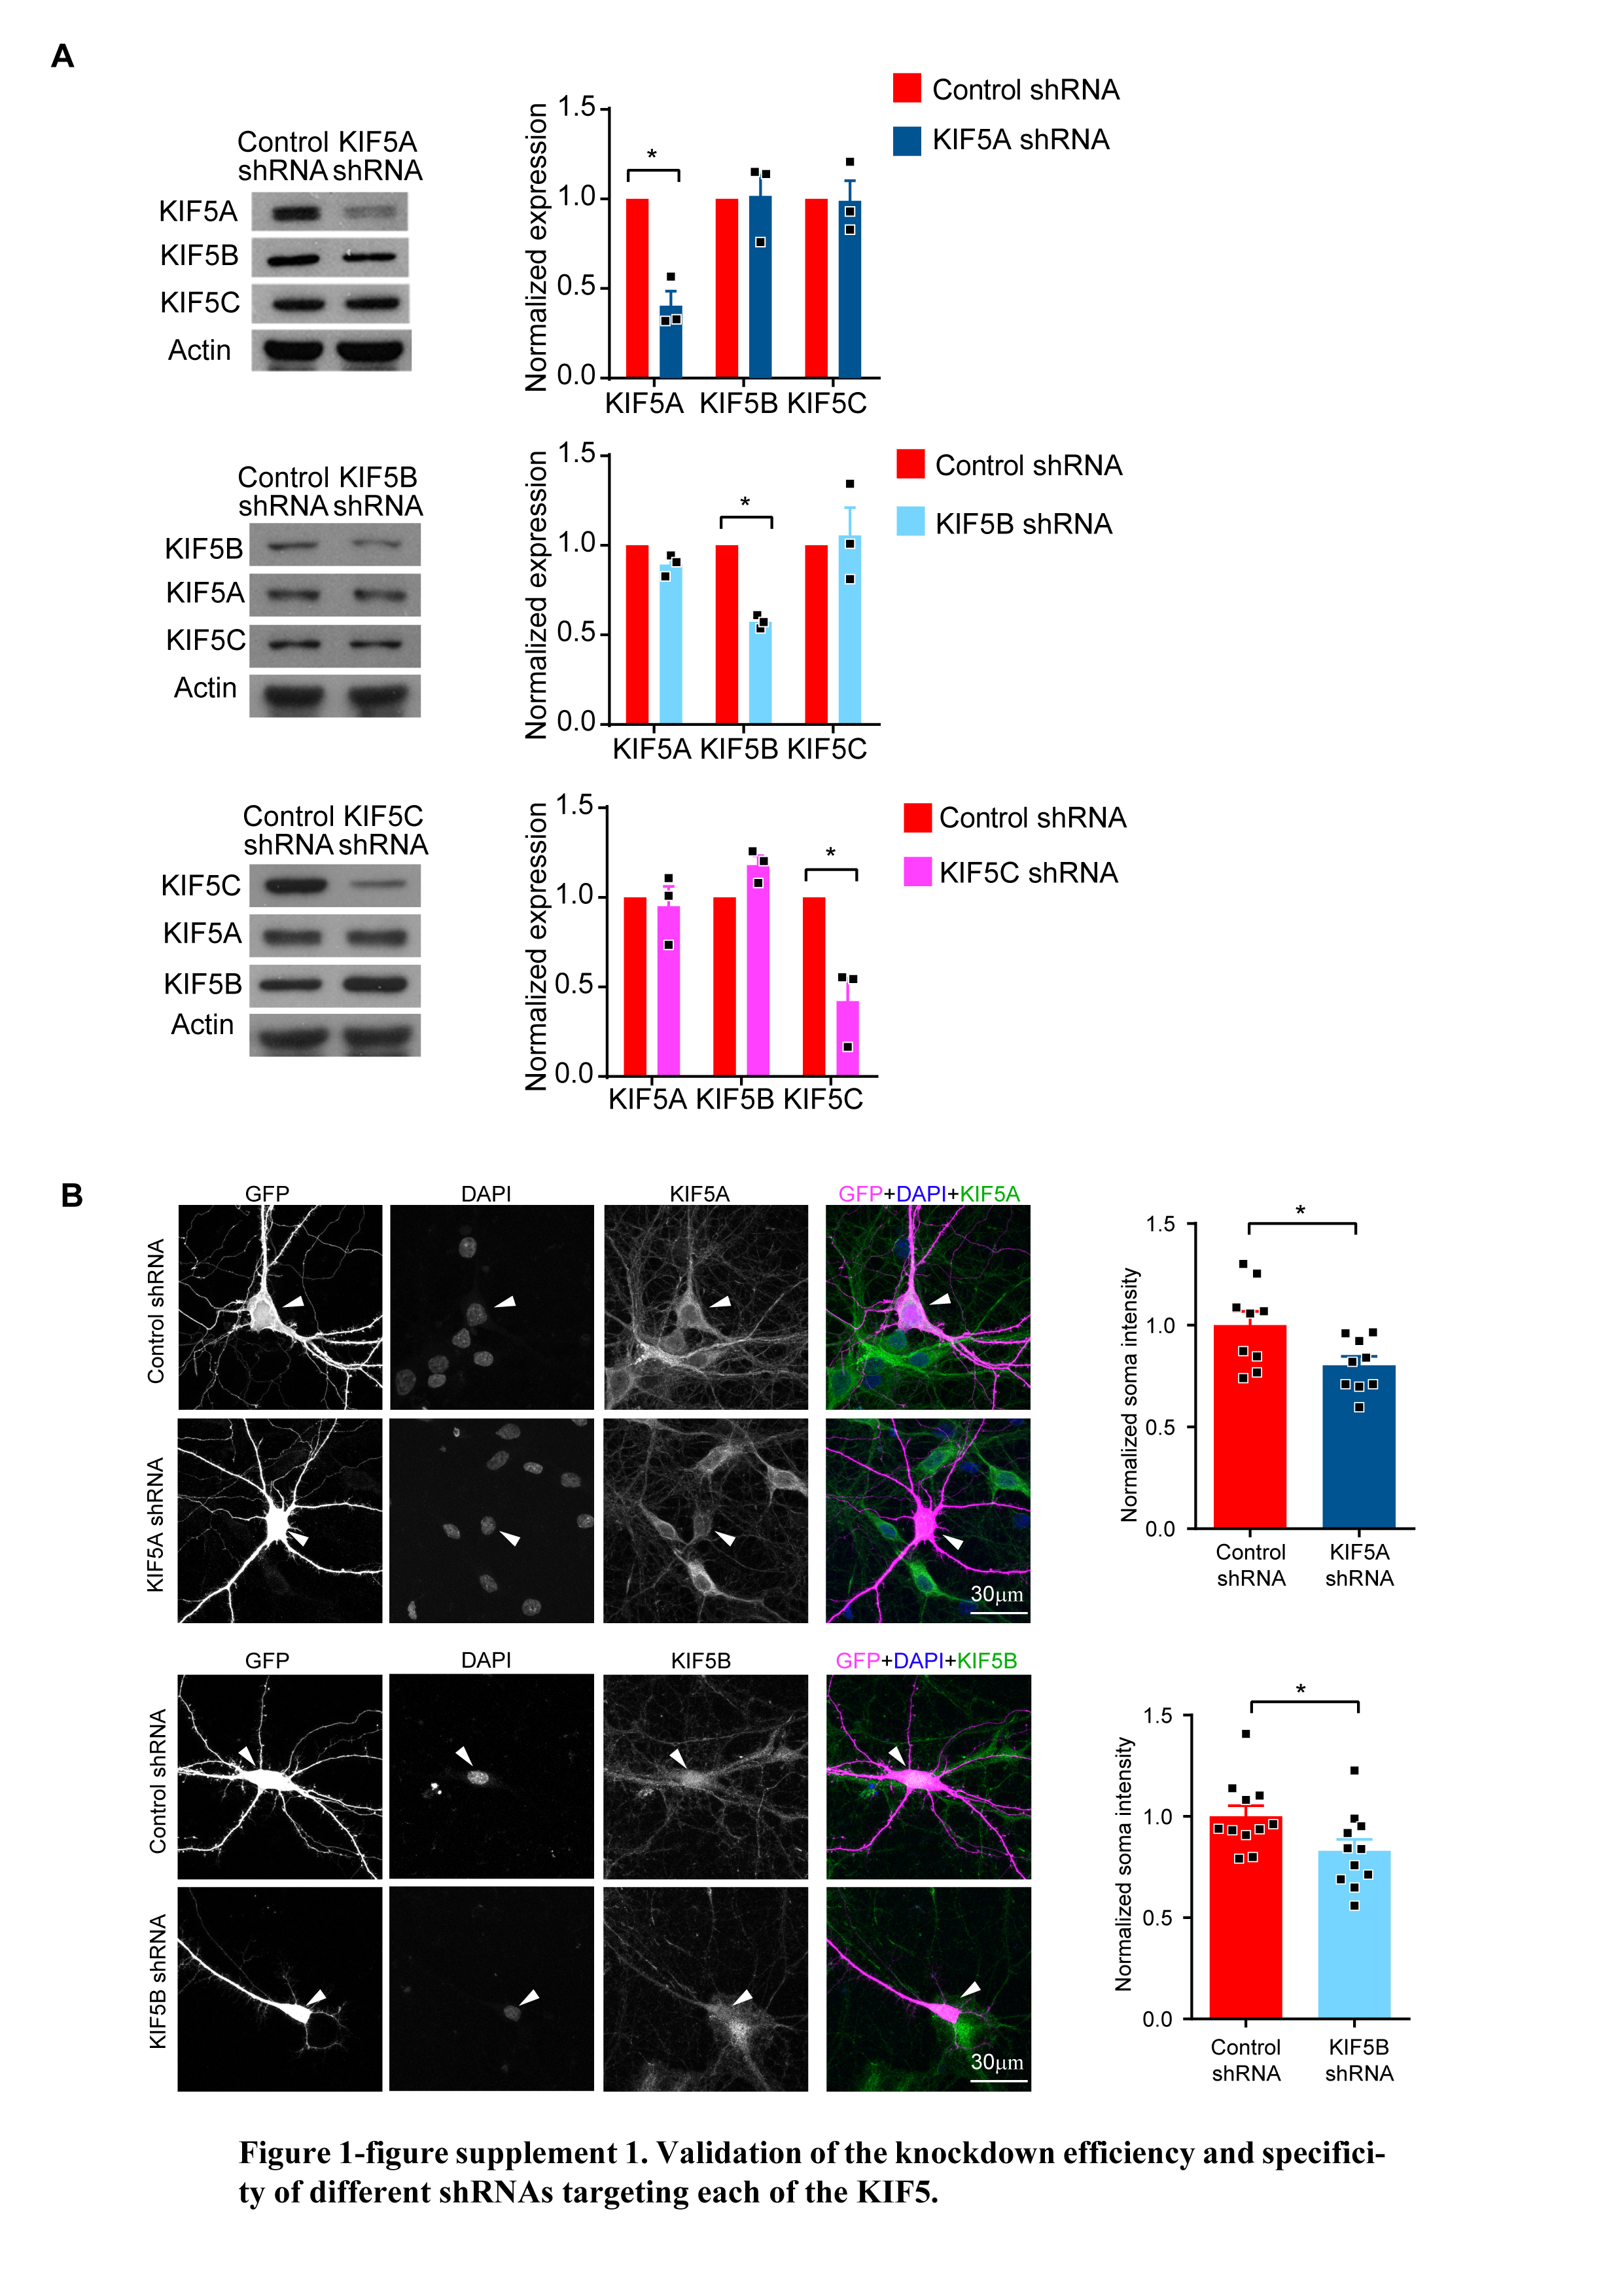

Supplement: supp [file elife-53456-supp-v1.zip › elife_poa_e53456_Figure_1_figure_supplement_1.jpg]

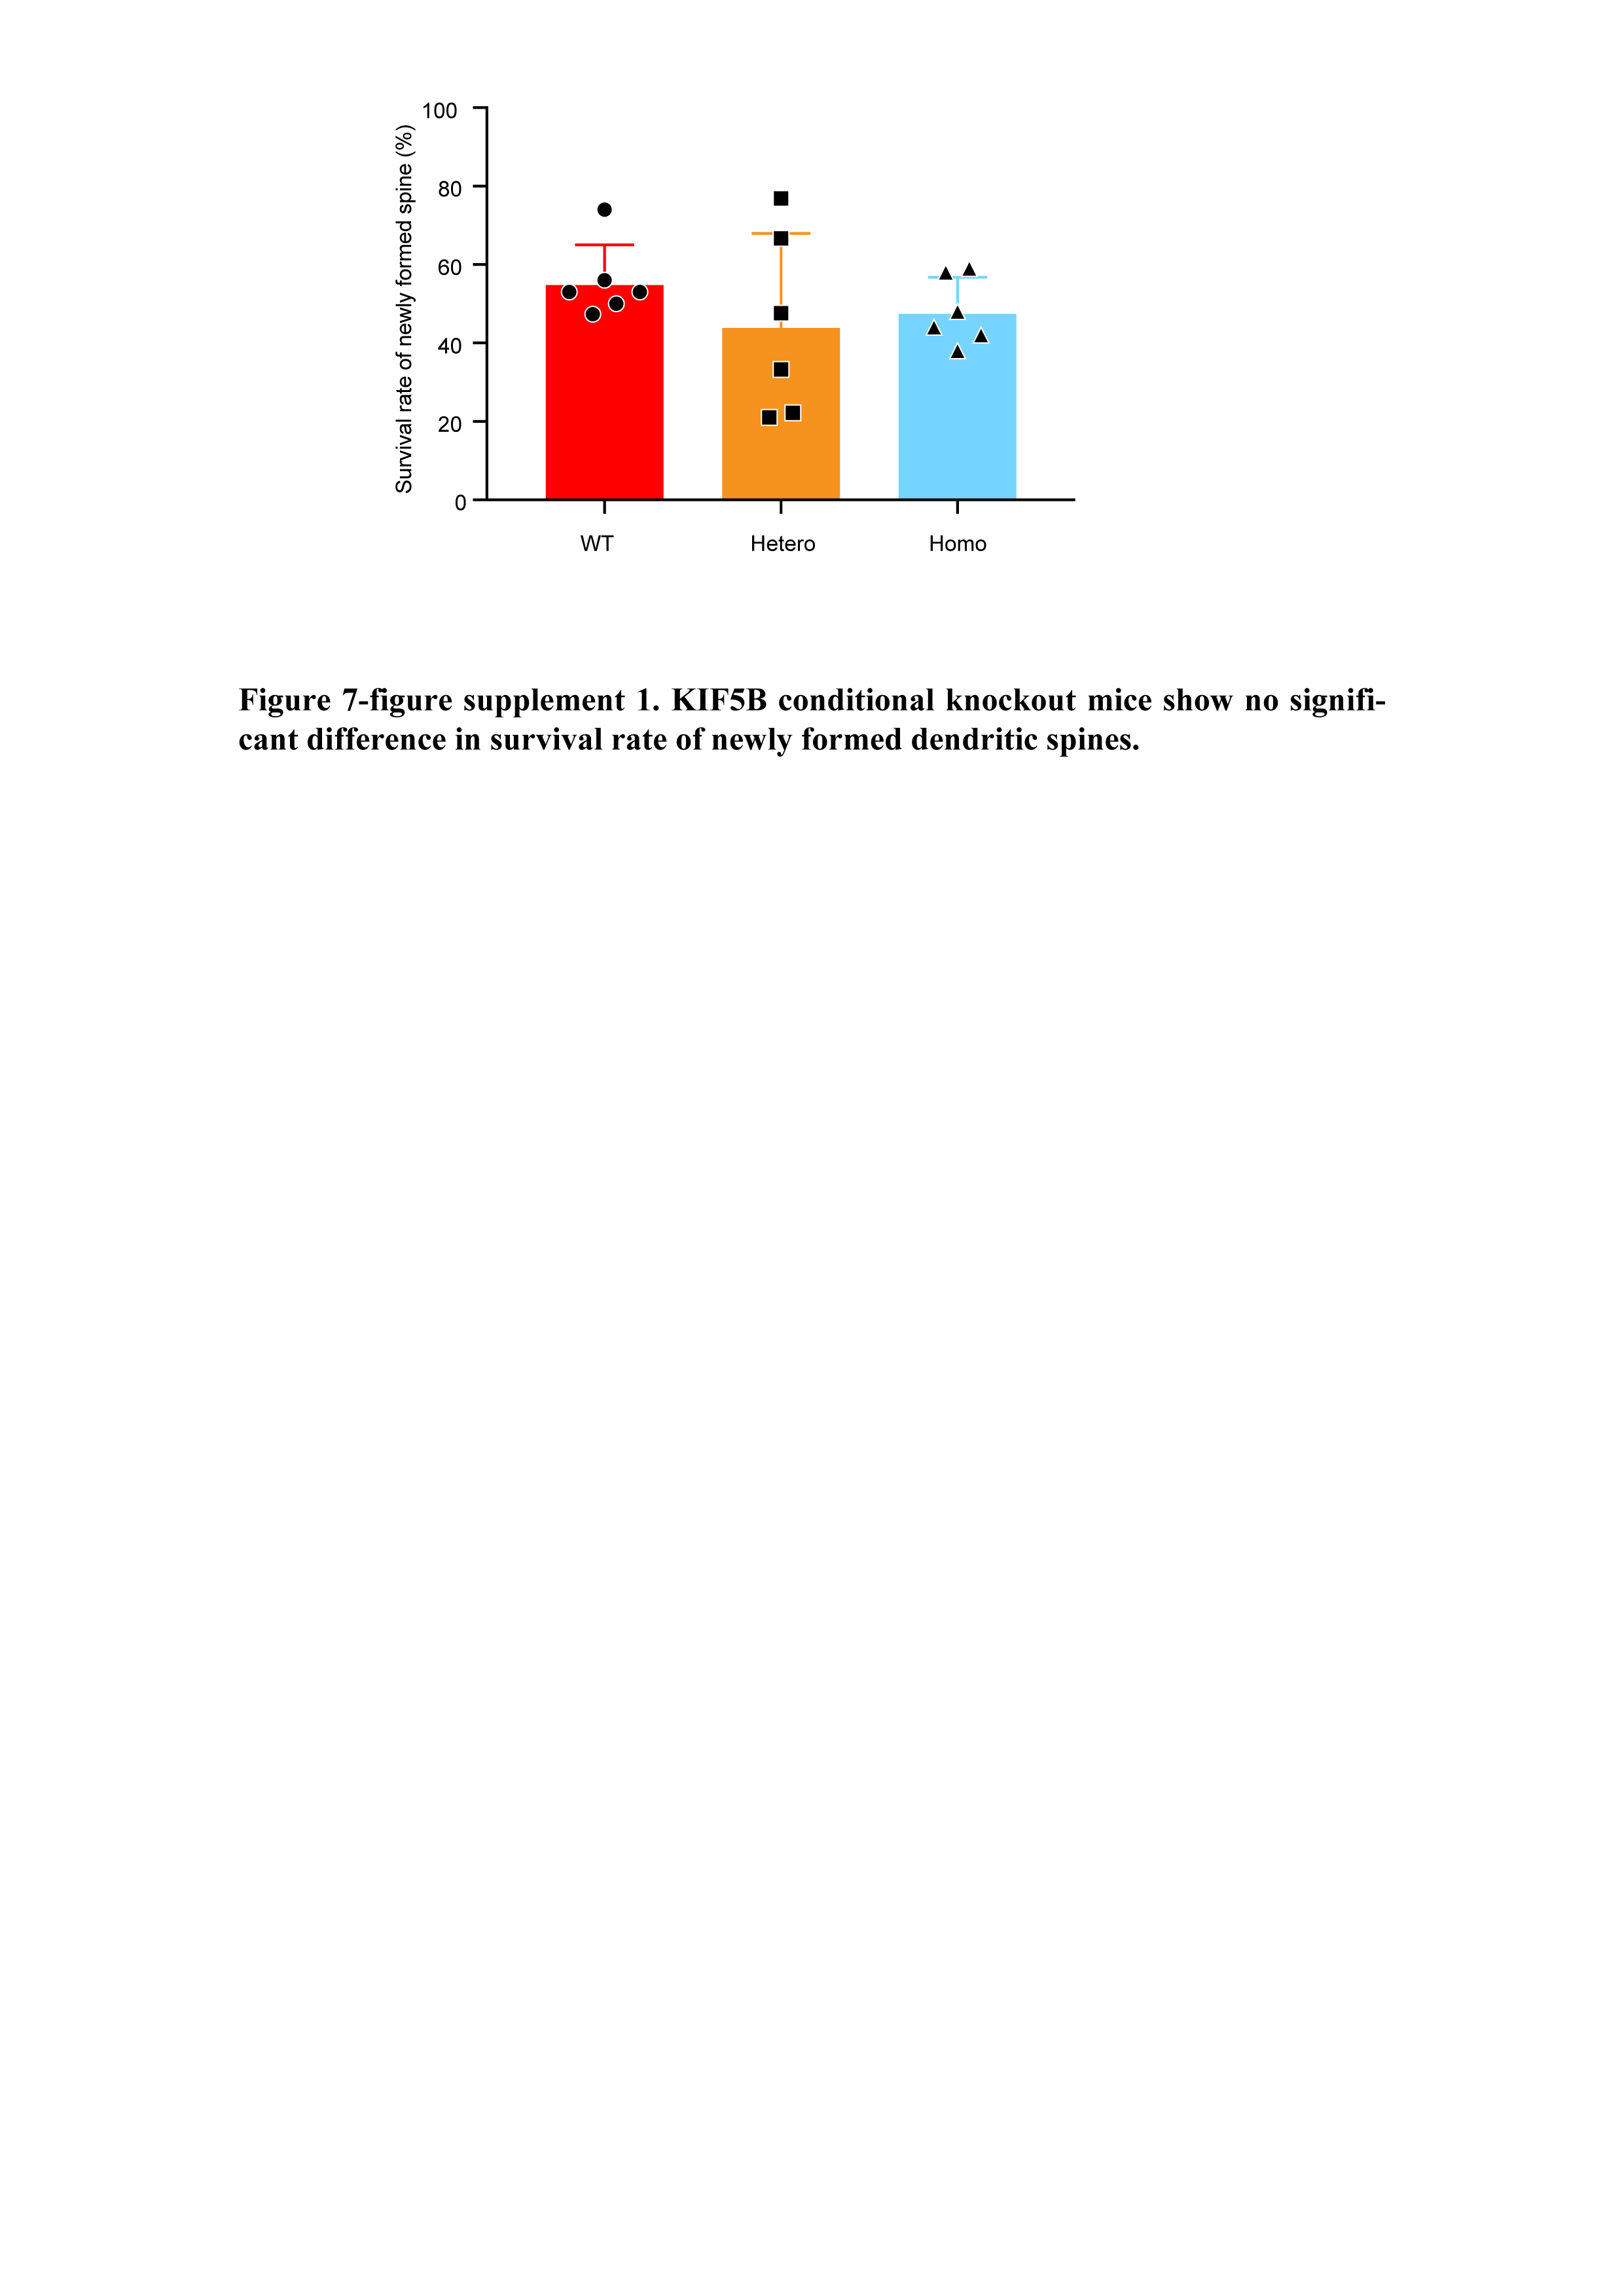

Supplement: supp [file elife-53456-supp-v1.zip › elife_poa_e53456_Figure_7_figure_supplement_1.jpg]

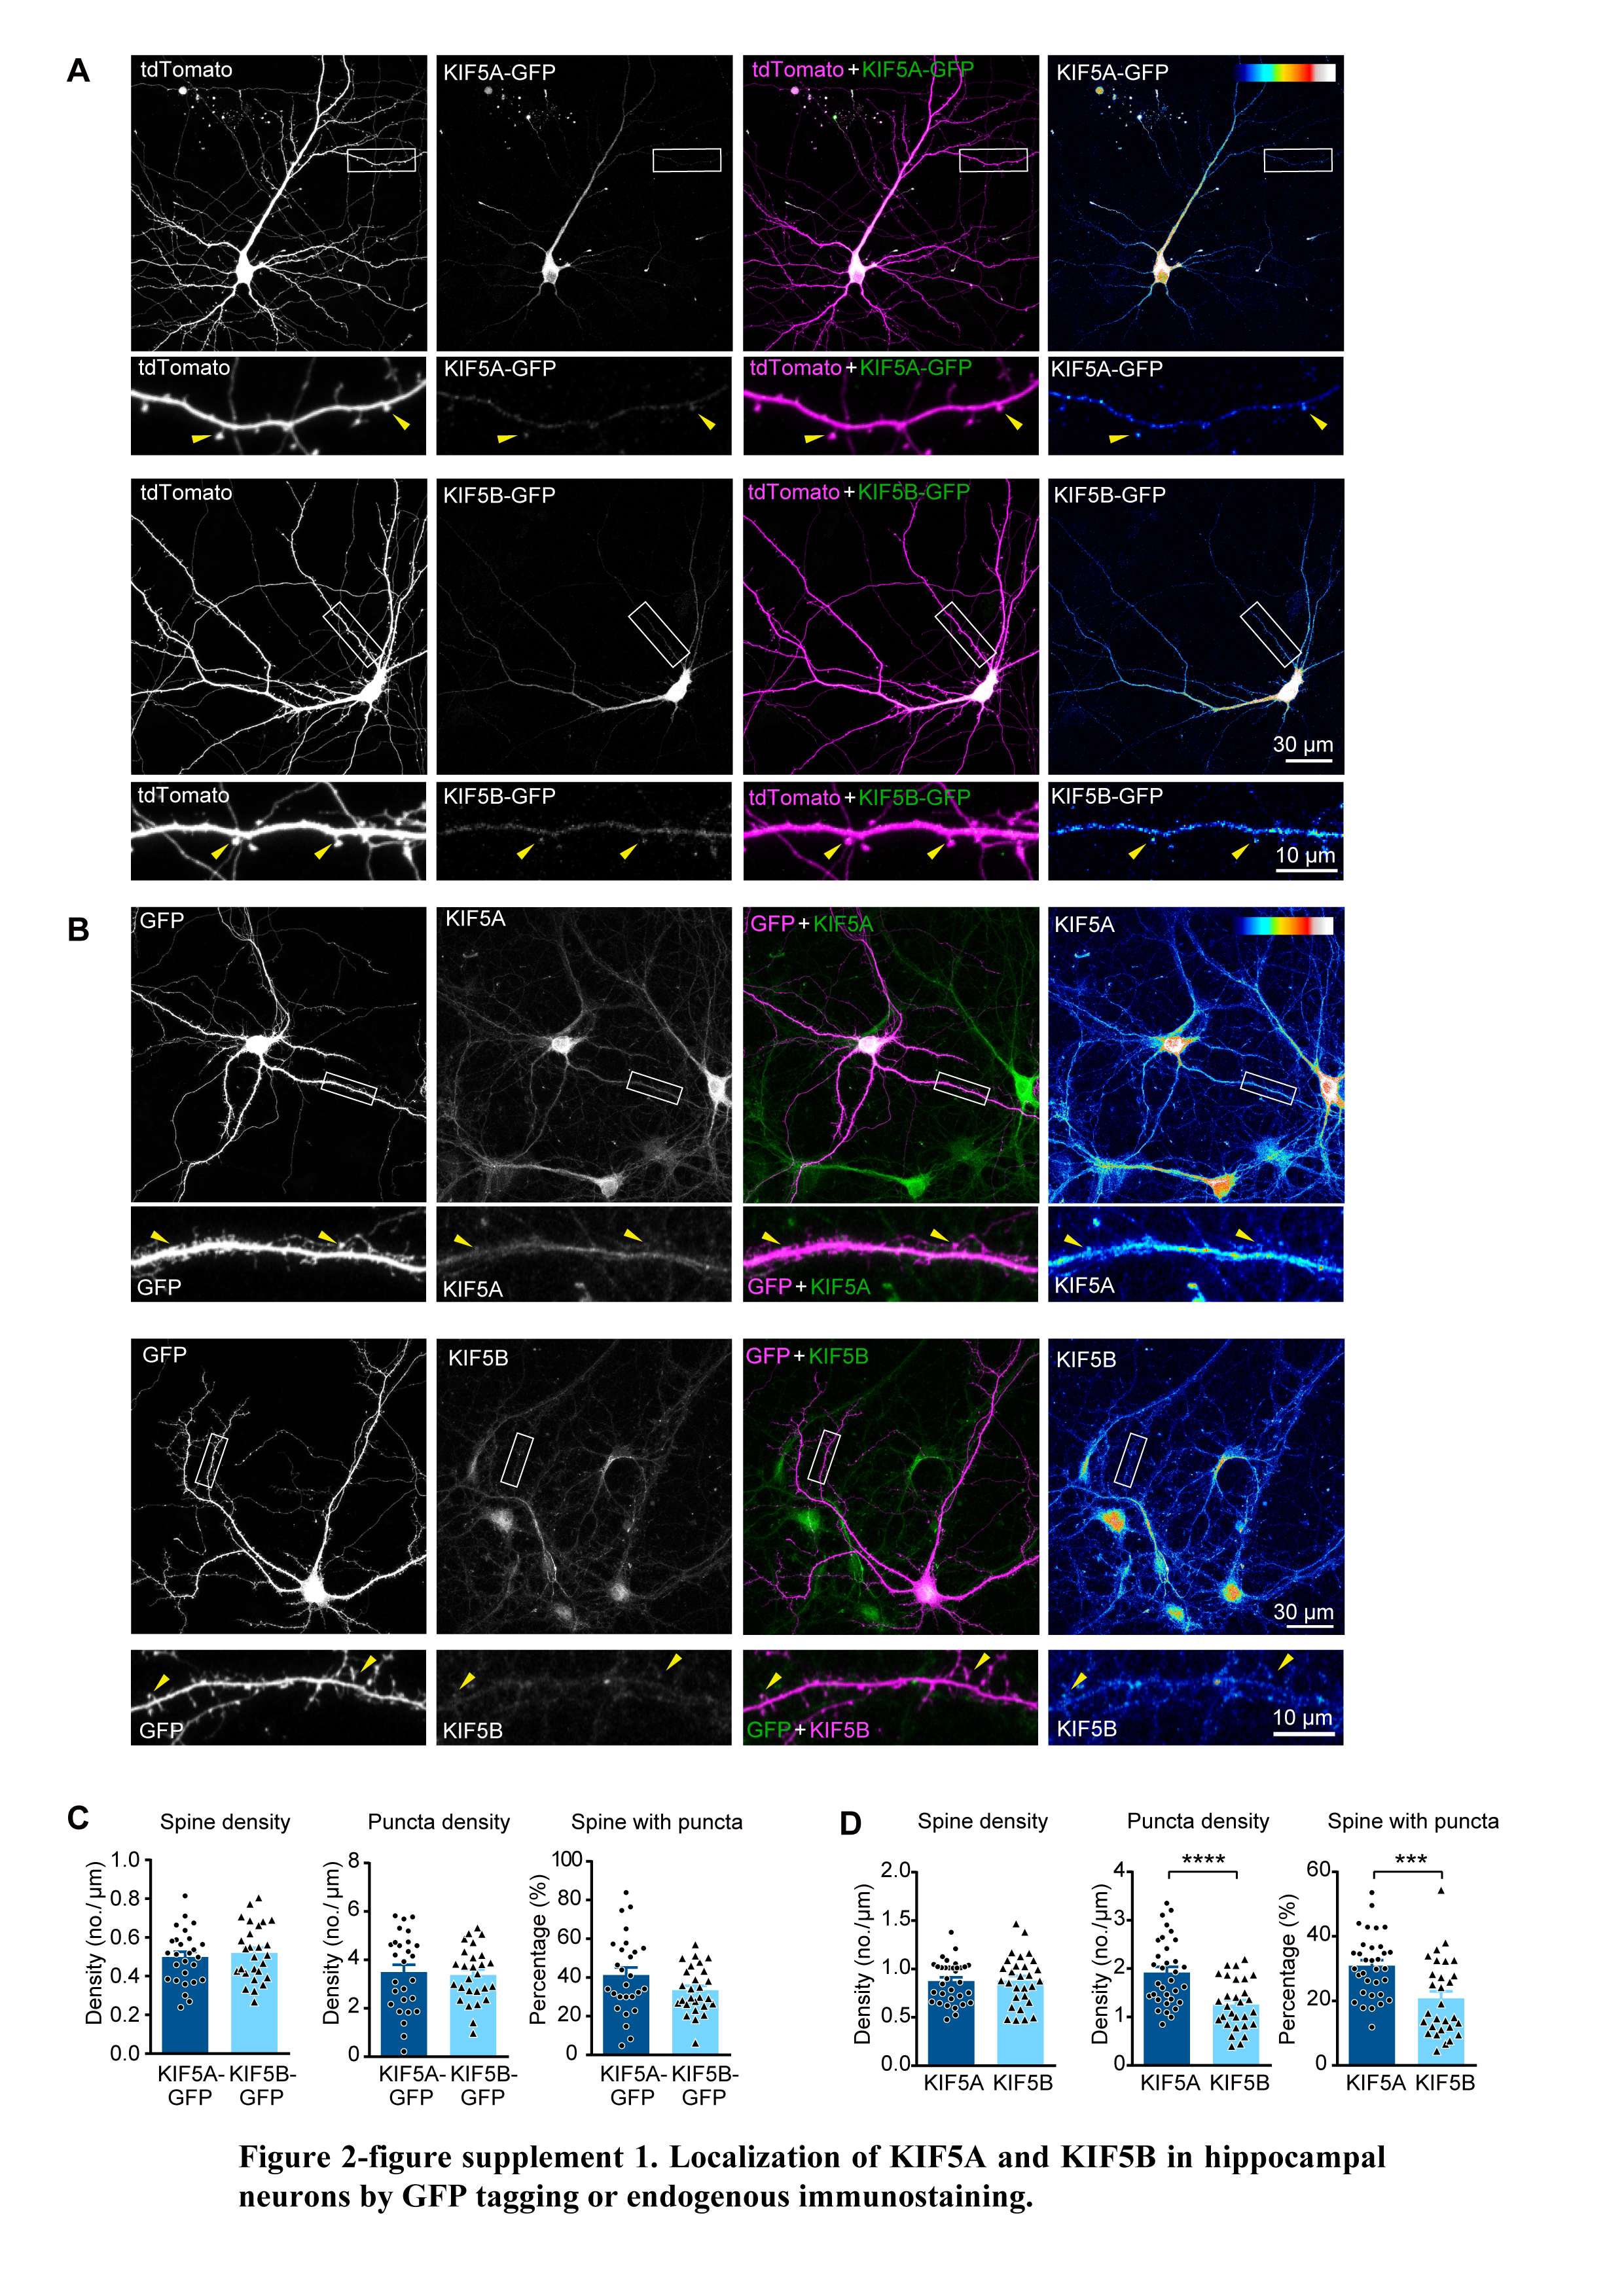

Supplement: supp [file elife-53456-supp-v1.zip › elife_poa_e53456_Figure_2_figure_supplement_1.jpg]

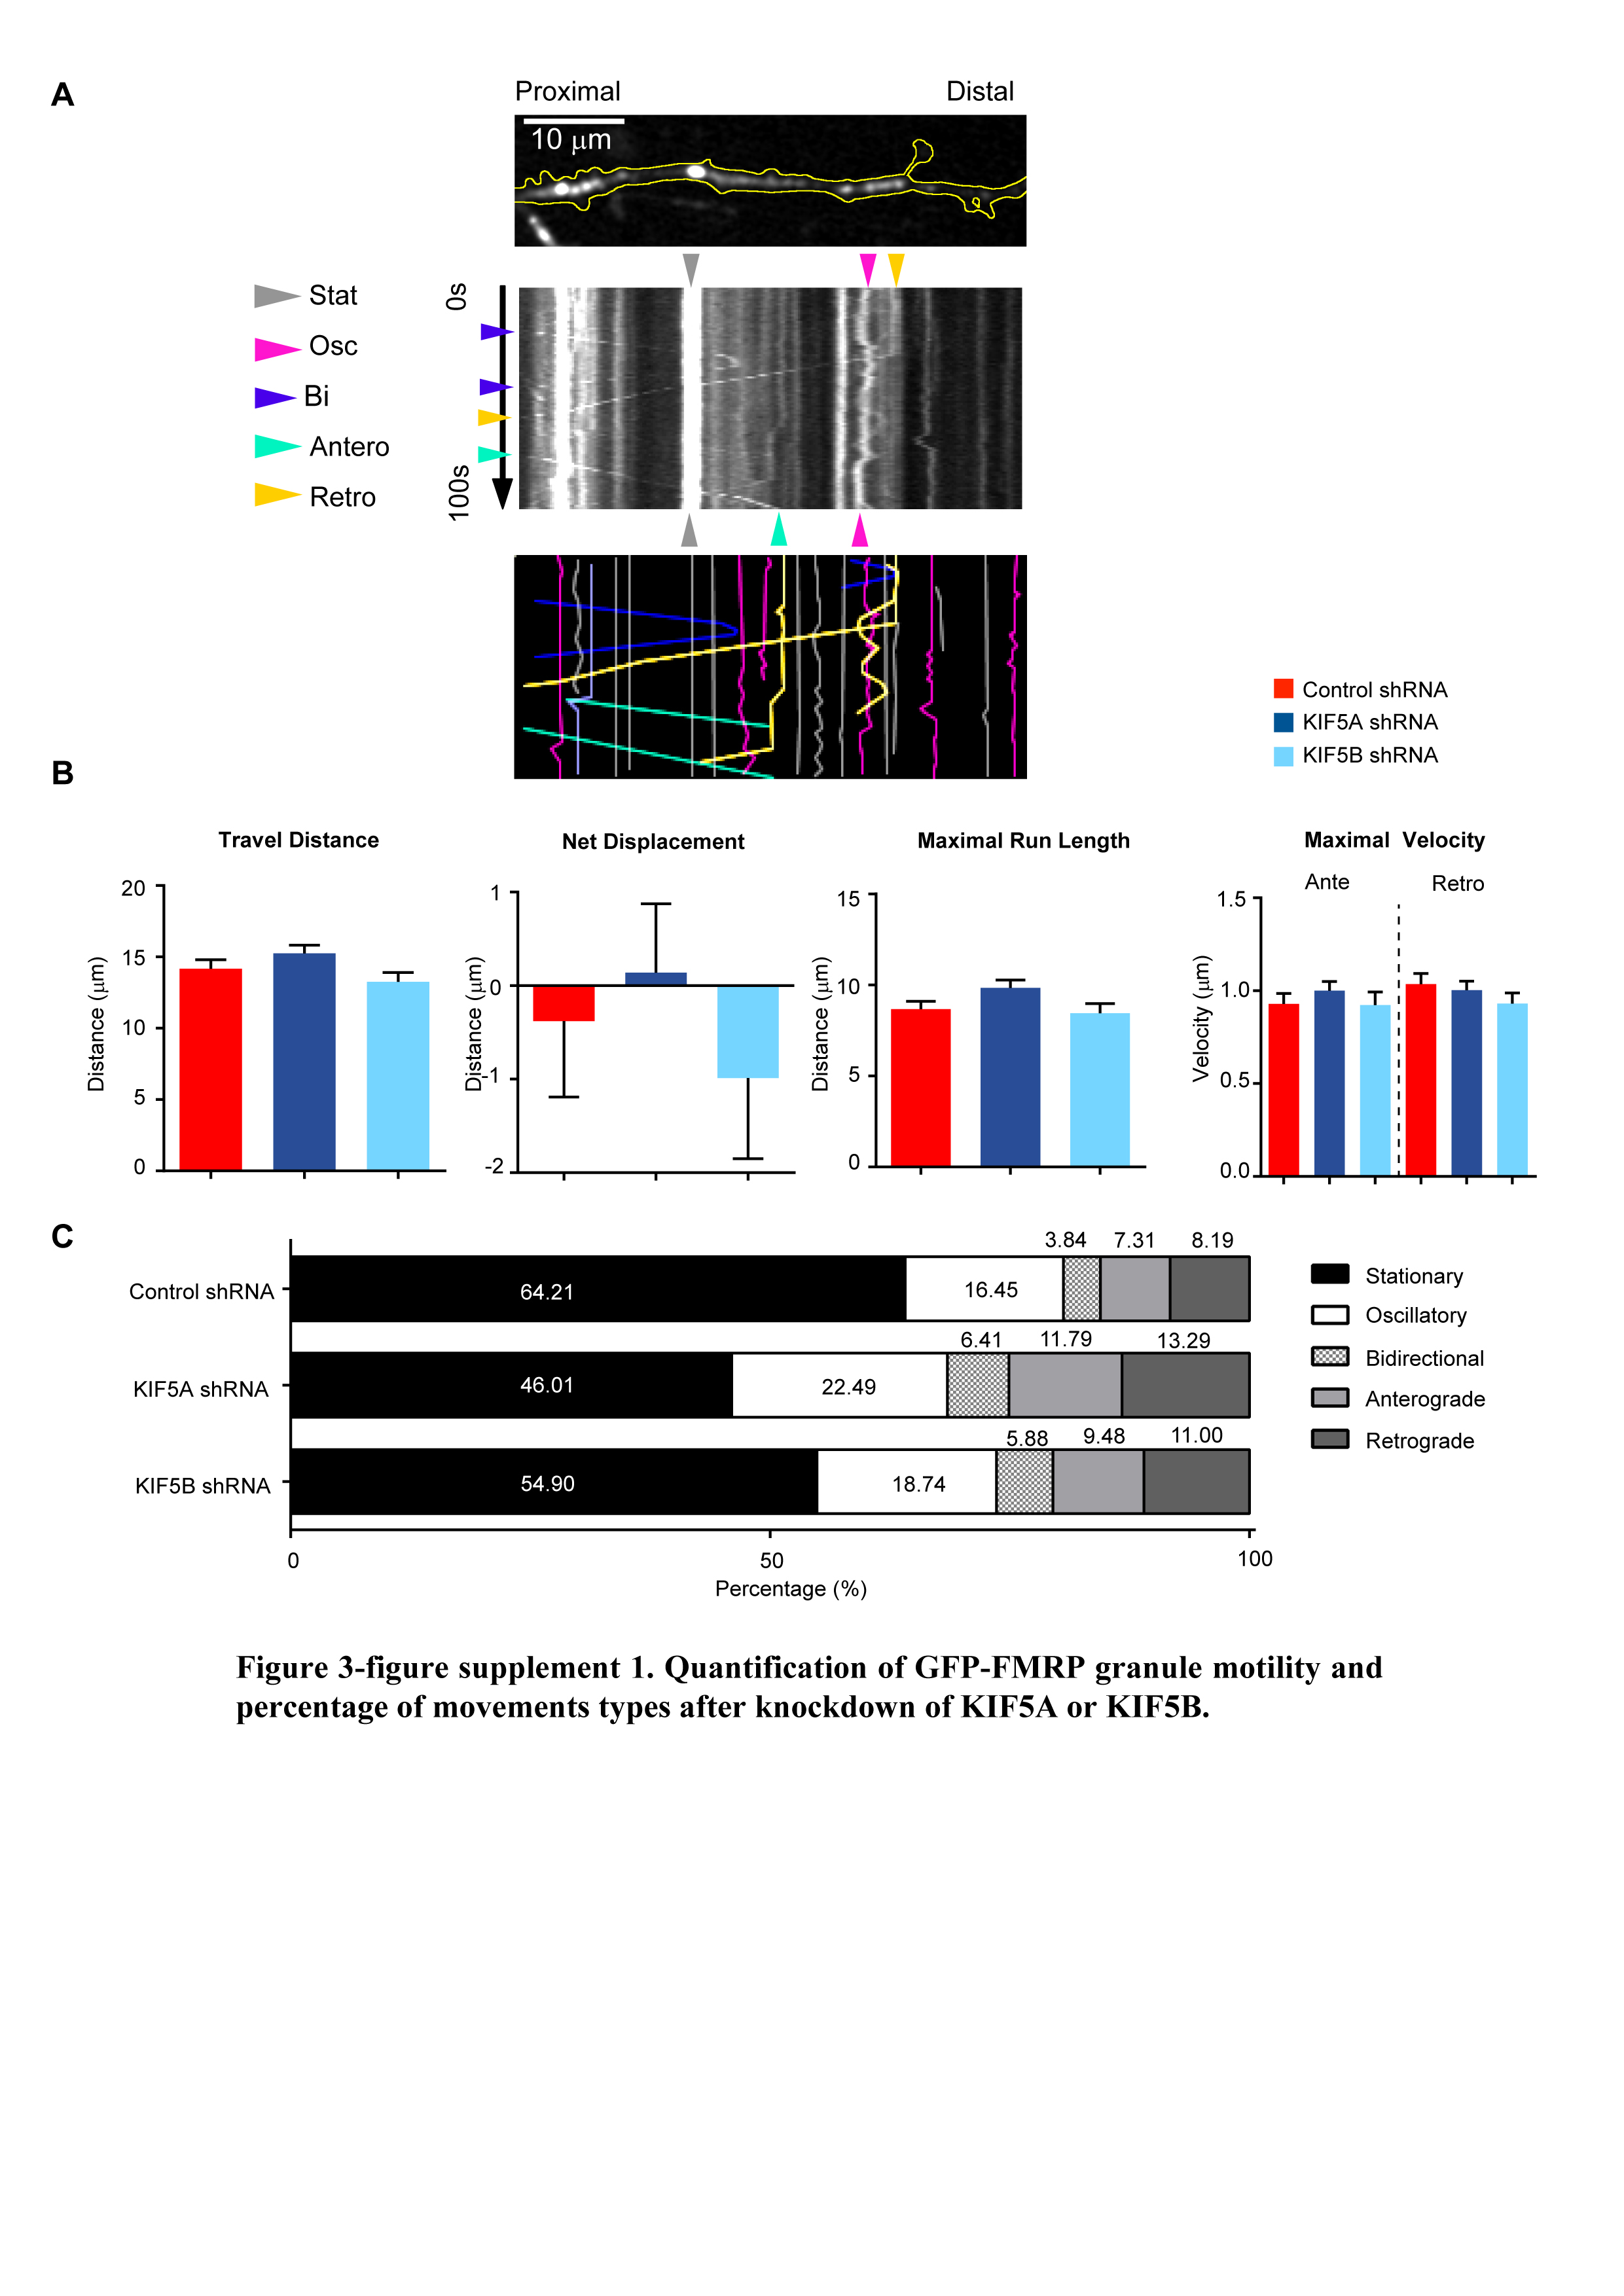

Supplement: supp [file elife-53456-supp-v1.zip › elife_poa_e53456_Figure_3_figure_supplement_1.jpg]
